# Supplementary material for: Myotonic dystrophy RNA toxicity alters morphology, adhesion and migration of mouse and human astrocytes
Source: PubMed Central journal article supplement (PMC9253038; doi:10.1038/s41467-022-31594-9), 2022-07-04
Supplement: 41467_2022_31594_MOESM1_ESM.pdf [file 41467_2022_31594_MOESM1_ESM.pdf]

### **Myotonic dystrophy RNA toxicity alters astrocyte morphology, adhesion and migration**

**Diana M. Dincă, Louison Lallemand, Anchel Gonzalez-Barriga, Noémie Cresto, Sandra O. Braz, Géraldine Sicot, Laure-Elise Pillet, H  l  ne Polveche, Paul Magneron, Aline Huguet-Lachon, H  l  ne Benyamine, Cuauhtli N. Azotla-Vilchis, Luis E. Agonizantes-Ju  rez, Julie Tahraoui, C  cile Martinat, Oscar Hern  ndez-Hern  ndez, Didier Auboeuf, Nathalie Rouach, Cyril F. Bourgeois, Genevi  ve Gourdon, M  rio Gomes-Pereira**

- Supplementary Fig. 1
- Supplementary Fig. 2
- Supplementary Fig. 3
- Supplementary Fig. 4
- Supplementary Fig. 5
- Supplementary Fig. 6
- Supplementary Fig. 7
- Supplementary Fig. 8
- Supplementary Fig. 9
- Supplementary Fig. 10
- Supplementary Fig. 11
- Supplementary Table 1
- Supplementary Table 2
- Supplementary Table 3
- Supplementary Table 4
- Supplementary Table 5
- Supplementary Table 6
- Supplementary Table 7
- Supplementary References
- Original uncropped scans of blots and gels

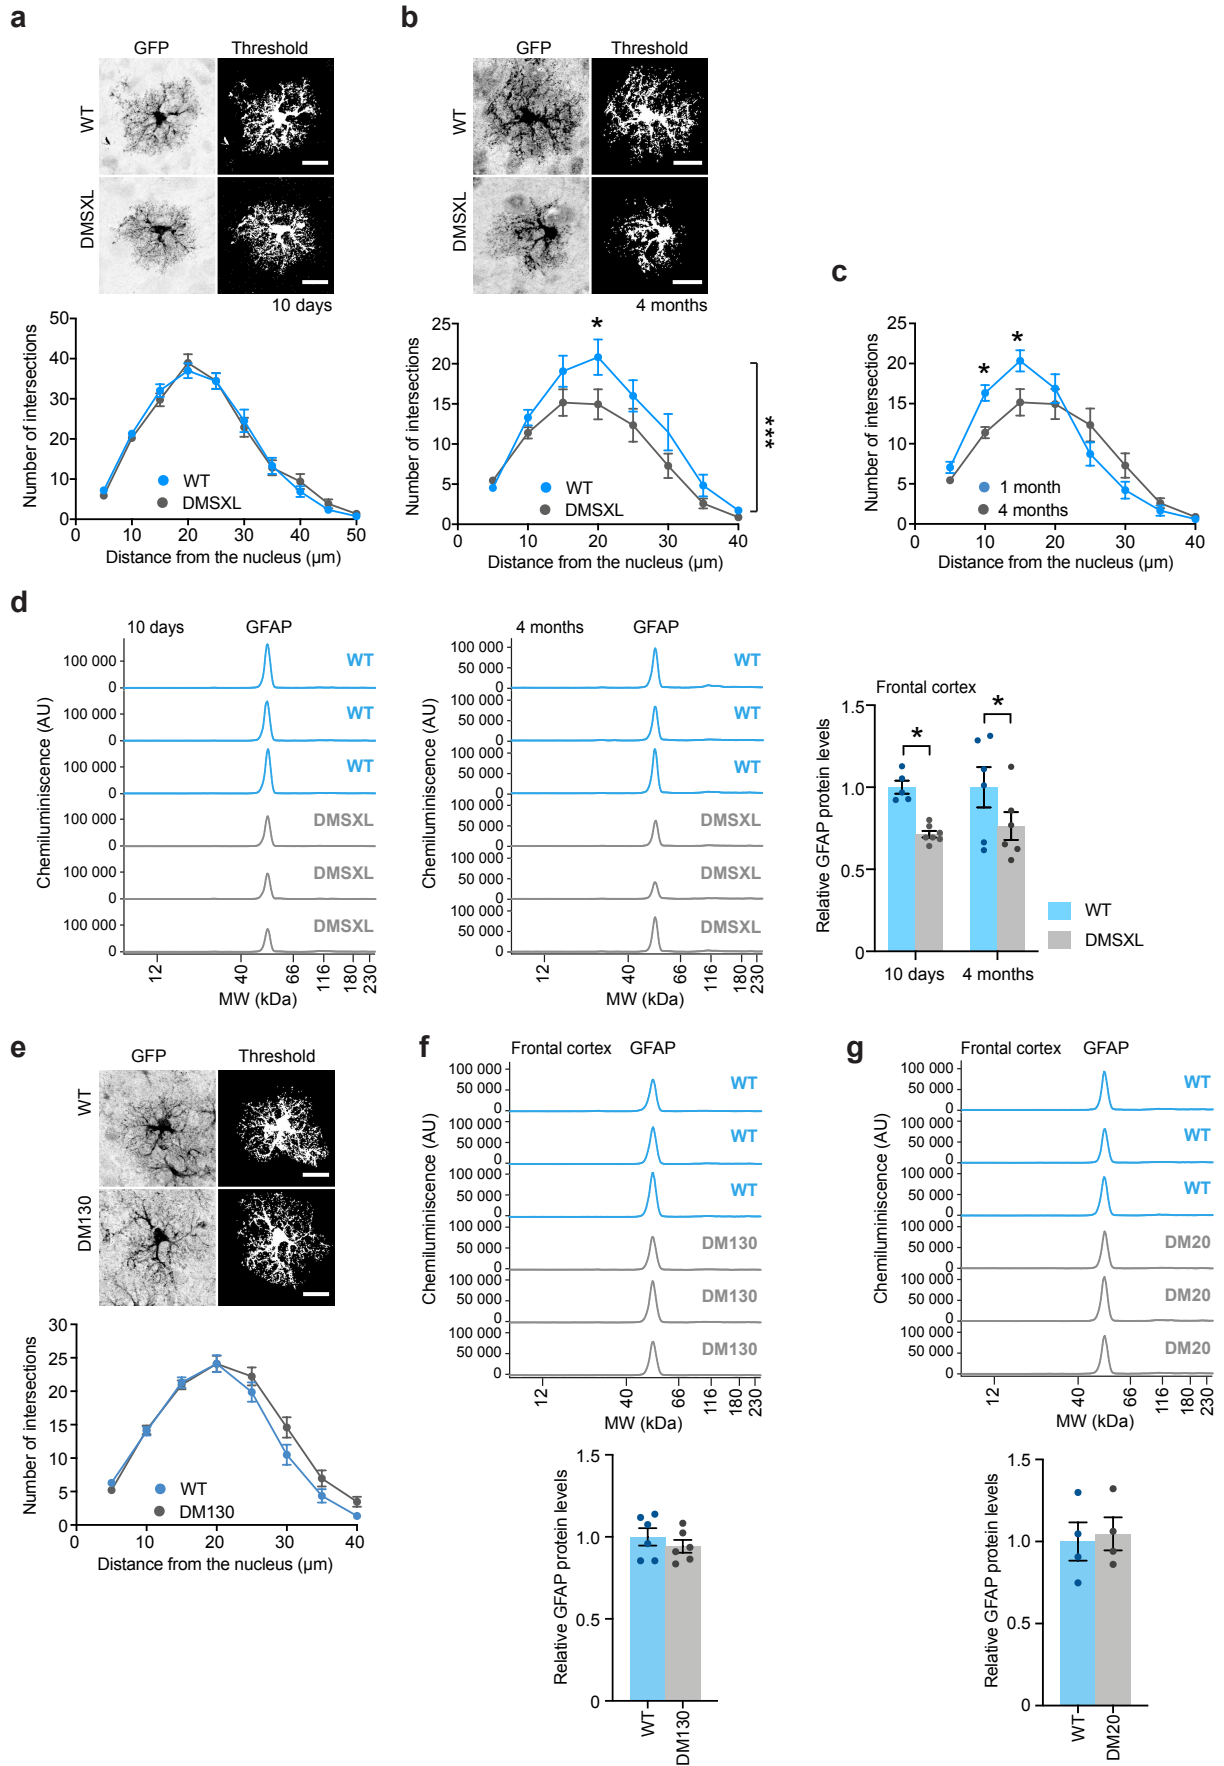



**Supplementary Fig. 1. Astrocyte morphology and GFAP expression.** (a) Sholl analysis of the branching of DMSXL cortical astrocytes at postnatal day 10. Scale bar, 20  $\mu\text{m}$ . Data are means  $\pm$  SEM. N = 4 mice, n = 20 cells, WT; N = 4 mice, n = 20 cells, DMSXL ( $p = 0.9890$ , Two-way ANOVA). (b) Sholl analysis of the branching of DMSXL cortical astrocytes at 4 months. Scale bar, 20  $\mu\text{m}$ . Data are means  $\pm$  SEM. N = 4 mice, n = 17 cells, WT; N = 4 mice, n = 18 cells, DMSXL ( $p = 0.0002$ , Two-way ANOVA;  $p = 0.0195$ , 20  $\mu\text{m}$ ; Sidak post-hoc test for multiple comparisons). (c) Comparison of cortical DMSXL astrocyte branching at 1 and 4 months. Data are means  $\pm$  SEM. N = 4 mice, n = 20 cells, 1 month; N = 4 mice, n = 18 cells, 4 months ( $p = 0.0390$ , 10  $\mu\text{m}$ ;  $p = 0.0264$ , 15  $\mu\text{m}$ ; Two-way ANOVA, Sidak post-hoc test for multiple comparisons). (d) Quantification of GFAP expression in whole frontal cortex tissue lysates of control and DMSXL mice at 10 days and 4 months of age. Representative electrophoretic profiles are shown on the left. Data are means  $\pm$  SEM. 10 days: n = 4, WT; n = 4, DMSXL. 4 months: n = 6, WT; n = 6, DMSXL ( $p = 0.0177$ , 10 days;  $p = 0.0426$ , 4 months; Two-way ANOVA, Sidak post-hoc test for multiple comparisons). (e) Sholl analysis of the branching of DM130 cortical astrocytes at 1 month. GFP signal was analyzed by applying the same threshold to all images. Scale bar, 20  $\mu\text{m}$ . Data are means  $\pm$  SEM. N = 4 mice, n = 26 cells, WT; N = 4 mice, n = 27 cells, DMSXL ( $p = 0.1141$ , Two-way ANOVA). (f) Quantification of GFAP expression in whole frontal cortex tissue lysates of control DM130 mice at 1 month, by capillary basis electrophoresis. Representative electrophoretic profiles are shown. Data are means  $\pm$  SEM. n = 6, WT; n = 6, DM130 ( $p=0.3972$ , Two-tailed Student's  $t$  test). (g) Quantification of GFAP expression in whole frontal cortex tissue lysates of control DM20 mice, at 1 month. Representative electrophoretic profiles are shown. Data are means  $\pm$  SEM. n = 4, WT; n = 4, DM20 ( $p=0.7729$ , Two-tailed Student's  $t$  test). Source data are provided as a Source Data file. \*  $p<0.05$ ; \*\*\*  $p<0.001$ .

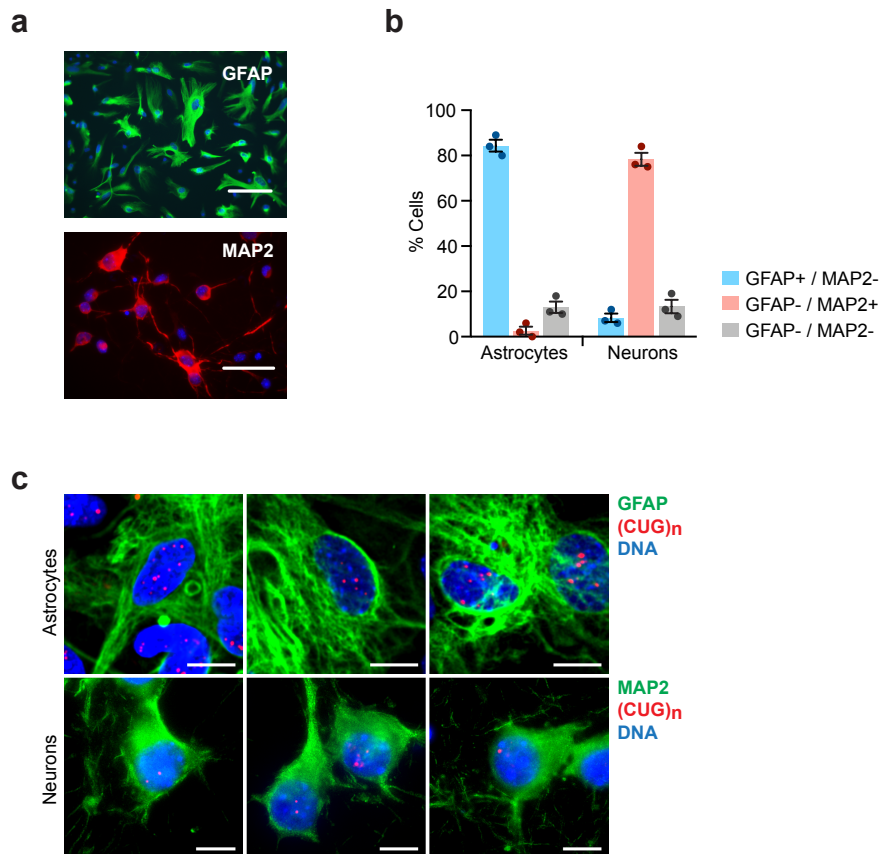

**Supplementary Fig. 2. Expression of astrocytic and neuronal markers in primary cell cultures derived from mouse brain cortex.** (a) We confirmed astrocyte and neuron enrichment in primary cultures by the immunofluorescence of astrocyte- and neuron-specific proteins, GFAP and MAP2, respectively. Representative immunofluorescent detection of primary mouse astrocytes expressing GFAP (green), and primary mouse neurons expressing MAP2 (red). Scale bar, 100  $\mu$ m. The experiment was performed on 3 independent cultures of each cell type. (b) Percentage of primary cells expressing GFAP or MAP2. Data are means  $\pm$  SEM; n = 3 independent WT cultures. The expression analysis of GFAP and MAP2 revealed that  $84.3 \pm 4.5\%$  of primary cells growing under conditions that favor astrocyte proliferation expressed GFAP. Conditions that favor neuronal survival yielded MAP2 staining in  $78.3 \pm 4.9\%$  of cells. (c) FISH detection of RNA foci in primary DMSXL mouse brain cells, illustrating a higher number of nuclear aggregates in GFAP-expressing astrocytes than in MAP2-expressing neurons. Scale bar, 10  $\mu$ m. The experiment was performed on 3 independent cultures of each cell type. Source data are provided as a Source Data file.

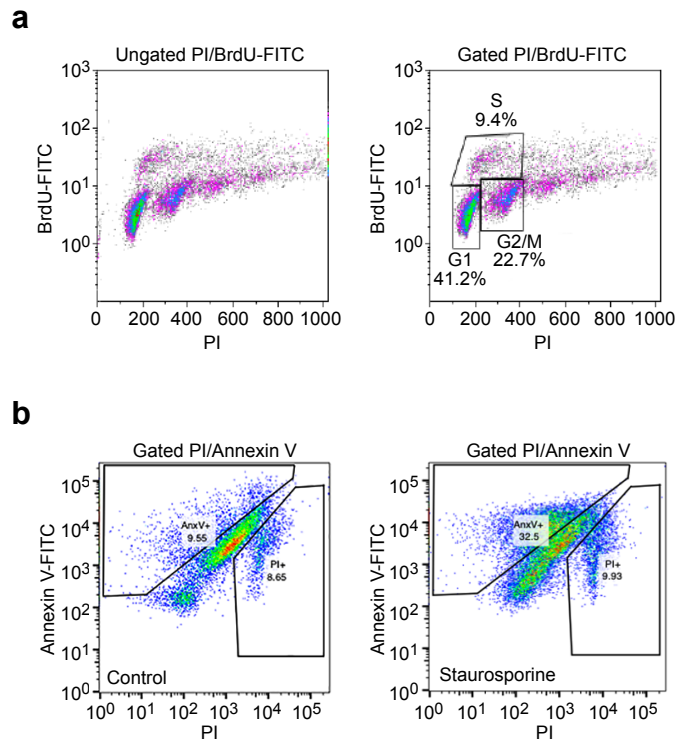

**Supplementary Fig. 3. FACS gating strategies. (a)** Example of flow cytometric gating for the quantification of distribution of cultured astrocytes between different phases of cell cycle. Cells were gated for PI and BrdU-FITC. **(b)** Example of flow cytometric gating for the quantification of apoptosis, under control conditions and staurosporine-induced stress. Cells were gated for PI and Annexin V-FITC.

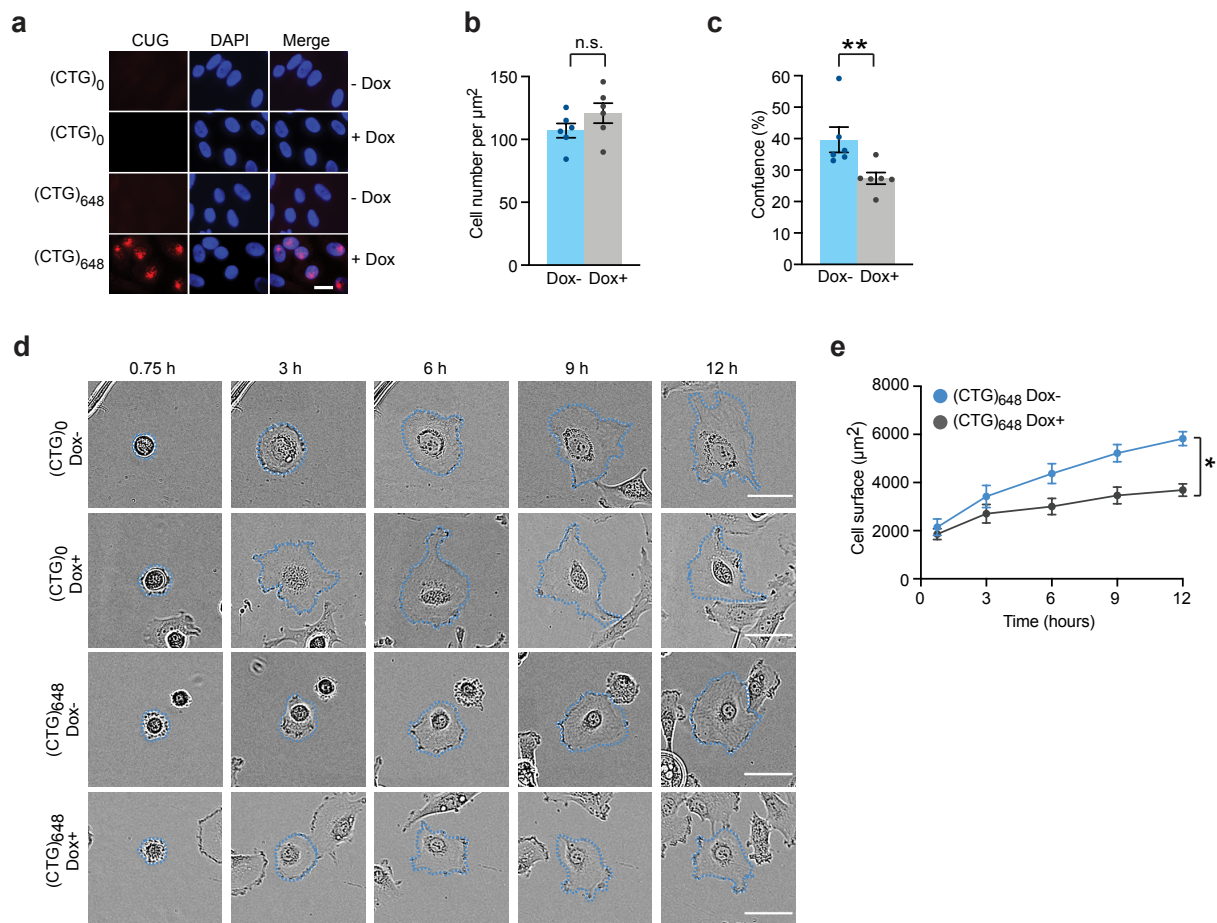

**Supplementary Fig. 4. Human glial cells transfected with expanded CTG repeats exhibit abnormal adhesion and reduced cell size.** (a) FISH detection of CUG RNA foci in human glia MIO-M1 cells expressing an inducible (CTG)<sub>648</sub> *DMPK* RNA, or a no-expansion (CTG)<sub>0</sub> control construct. Transgene induction by doxycycline was performed over 3 days and is indicated (Dox+, Dox-). Scale bar, 10 µm. The experiment was performed on 5 independent cultures of each group. (b) Quantification of the number of MIO-M1 cells attached 45 minutes after plating. Data are means ± SEM, n = 5 independent cultures per treatment (p = 0.1811, Two-tailed Student's *t* test). (c) Semi-automated quantification of cell culture confluence 45 minutes after plating. Data are means ± SEM, n = 5 independent cultures per treatment (p = 0.0087, Two-tailed Mann-Whitney *U* test). (d) Representative time-lapse bright field images of glial MIO-M1 cells expressing normal or expanded *DMPK* transcripts, over 12 hours after plating. Scale bar, 50 µm. The experiment was performed on 5 independent cultures of each group. (e) Size of individual MIO-M1 (CTG)<sub>648</sub> glial cells, following transgene induction (Dox+), versus non-induced cells (Dox-). Data are means ± SEM, n = 31 cells, Dox+; n = 30 cells, Dox- (p = 0.0246, Two-way repeated measures ANOVA). Source data are provided as a Source Data file. n.s., not significant; \* p<0.05; \*\* p<0.01.

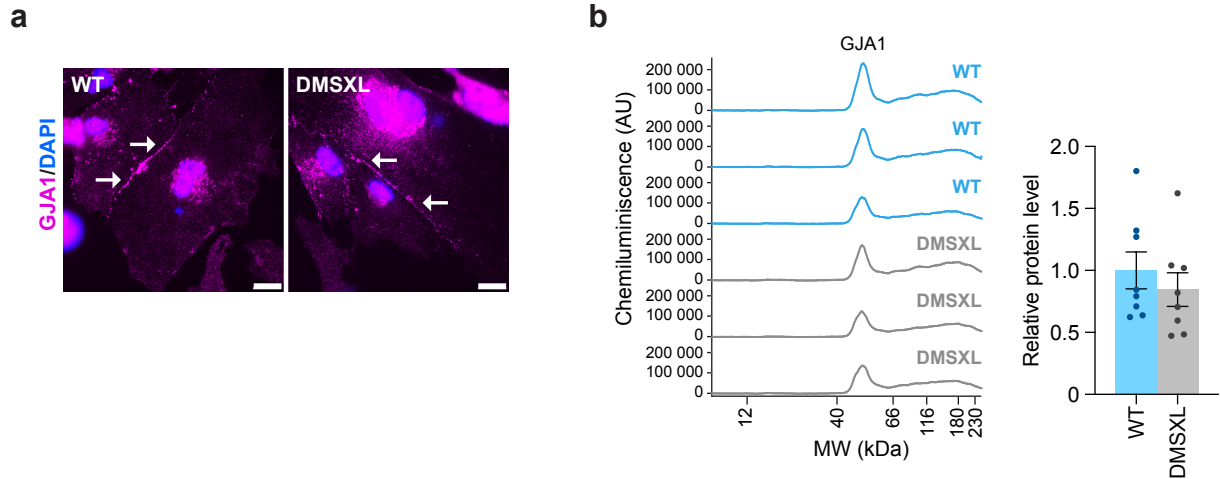

**Supplementary Fig. 5. Primary DMSXL astrocytes do not show abnormal assembly of gap junctions or altered expression GJA1 proteins. (a)** Immunofluorescence of GJA1 (magenta) showing punctuated staining of gap junctions (white arrows) along areas of cell-to-cell contact in cultured primary astrocytes. Scale bar, 20 μm. The experiment was performed on 3 independent cultures of each genotype. **(b)** Quantification of GJA1 protein levels in primary astrocytes by capillary basis electrophoresis. Representative electrophoretic profiles are shown on the left. Data are means ± SEM. n = 7 independent cultures per genotype (p = 0.2680, Two-tailed Student's *t* test). Source data are provided as a Source Data file.

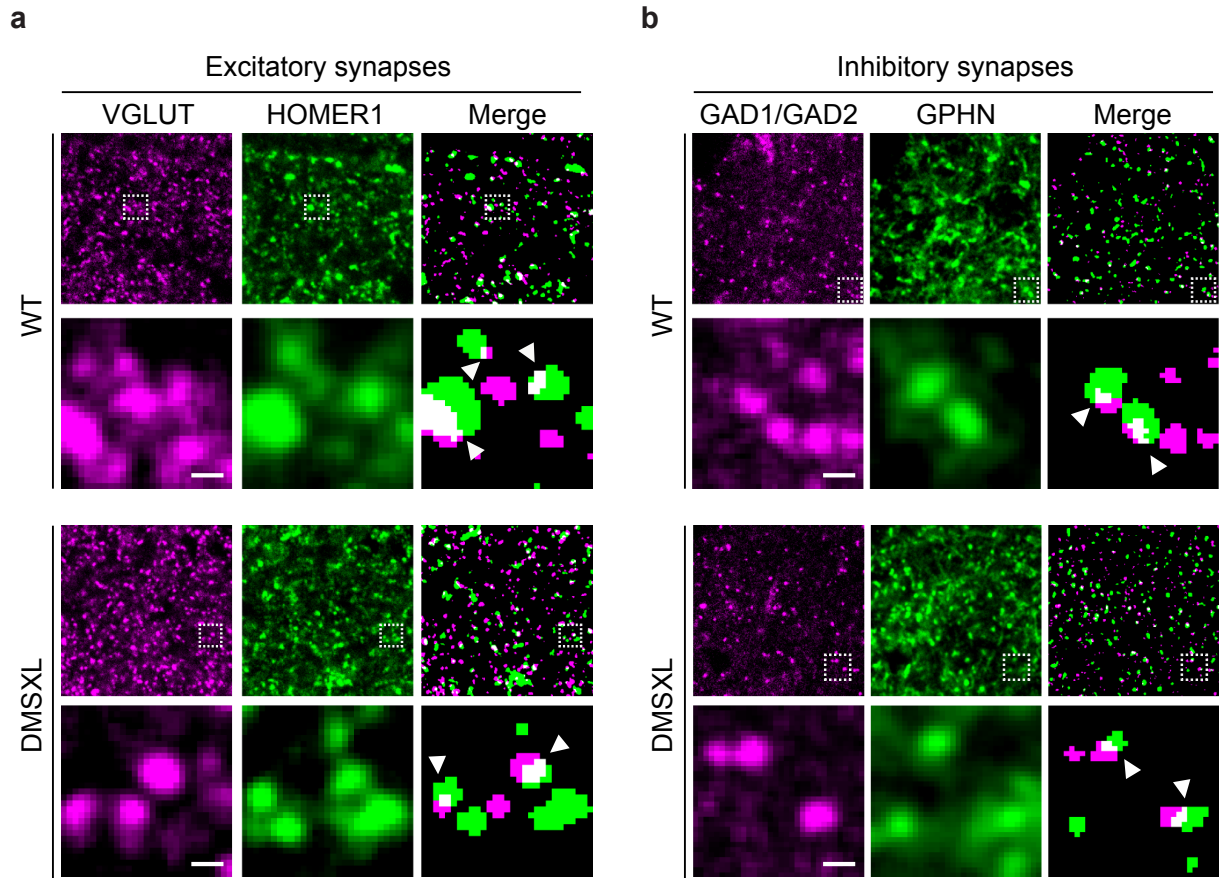

**Supplementary Fig. 6. Visualization of excitatory and inhibitory synapses in mouse frontal cortex. (a)** Excitatory synapses were identified by the co-localized clusters (merge, white) of VGLUT1 (magenta) and HOMER1 (green). **(b)** Inhibitory synapses were identified by the co-localized clusters (merge, white) of GAD1/GAD2 (magenta) and gephyrin (GPHN, green). High magnification insets show co-localization analysis (white arrowheads) performed on binary images (masks). Scale bar, 5  $\mu$ m. The experiments were performed on 5 independent animals of each cell type.

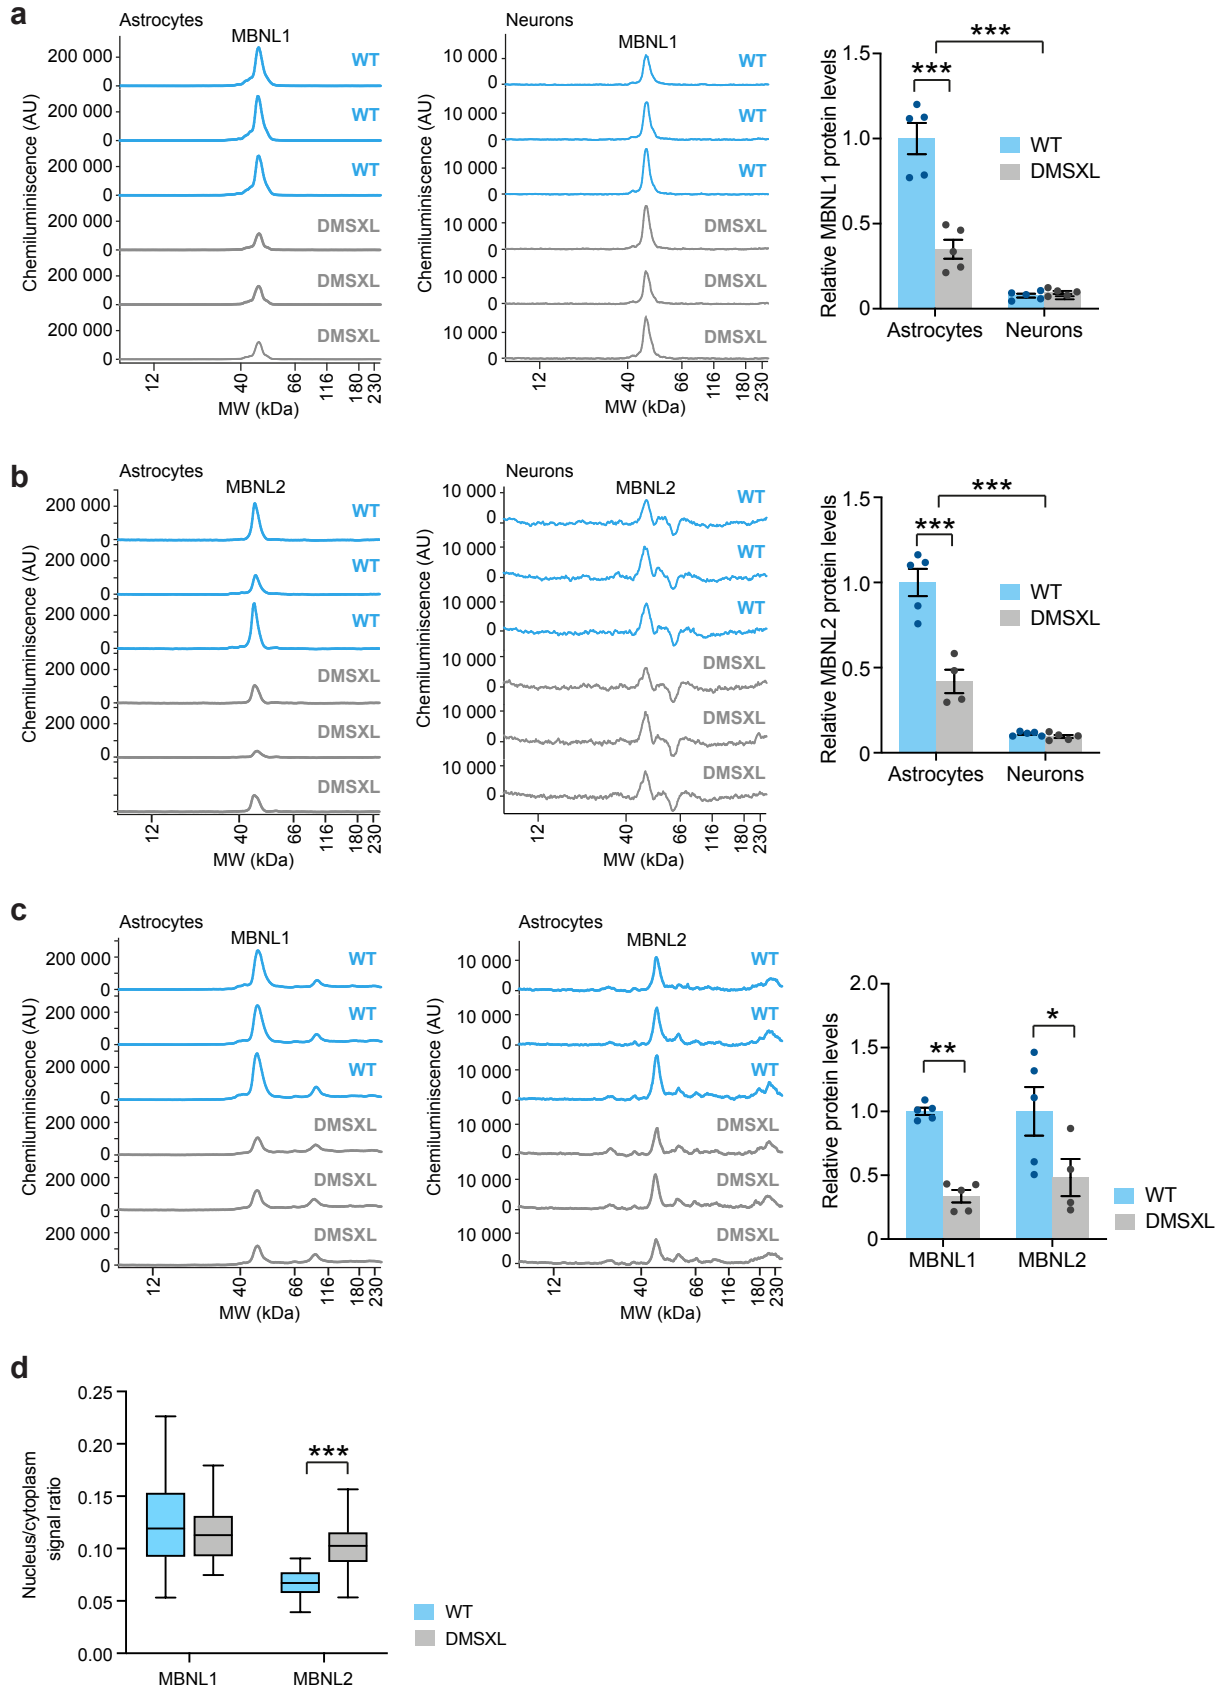

**Supplementary Fig. 7. Primary DMSXL astrocytes show MBNL1 and MBNL2 protein downregulation.** (a) Quantification of MBNL1 protein levels in primary astrocytes and neurons by capillary basis electrophoresis, using an antibody against recombinant full length MBNL1 protein. Representative electrophoretic profiles are shown on the left. Data are means  $\pm$  SEM, n = 5 independent cell cultures per genotype ( $p < 0.0001$ , Two-way ANOVA;  $p < 0.0001$ , astrocytes, Sidak post-hoc pair-wise comparisons). (b) Quantification of MBNL2 protein levels in primary astrocytes and neurons by capillary basis electrophoresis, using an antibody raised against recombinant full length MBNL2 protein. Representative electrophoretic profiles are shown on the left. Data are means  $\pm$  SEM, n = 5 independent cell cultures per genotype ( $p < 0.0001$ , Two-way ANOVA;  $p < 0.0001$ , astrocytes, Sidak post-hoc pair-wise comparisons). (c) Quantification of MBNL1 and MBNL2 protein levels in primary astrocytes and neurons by capillary basis electrophoresis, using independent antibodies raised against synthetic peptides corresponding to amino acid sequences 250-350 and 46-95 of human proteins, respectively. Representative electrophoretic profiles are shown on the left. Data are means  $\pm$  SEM. MBNL1: n = 5 independent astrocyte cultures per genotype. MBNL2: n = 5 independent WT astrocyte cultures, n = 4 independent DMSXL astrocyte cultures ( $p = 0.0024$ , MBNL1;  $p = 0.0209$ , MBNL2, Two-way ANOVA, Sidak post-hoc pair-wise comparisons). (d) Nucleo-cytoplasmic localization of MBNL1 and MBNL2 in primary astrocytes. Tukey whisker plots represent the ratio between the nuclear and cytoplasmic immunofluorescent signal. The plots display the median and extend from the 25<sup>th</sup> percentile up to the 75<sup>th</sup> percentiles. The whiskers are drawn down to the 10<sup>th</sup> percentile, and up to the 90<sup>th</sup> percentile. N = 5 independent cultures per genotype. MBNL1: n = 38 cells, WT; n = 36 cells, DMSXL. MBNL2: n = 26 cells, WT; n = 44 cells, DMSXL ( $p < 0.0001$ , Two-way ANOVA, Sidak post-hoc pair-wise comparisons). Source data are provided as a Source Data file. \*  $p < 0.05$ ; \*\*  $p < 0.01$ ; \*\*\*  $p < 0.001$ .



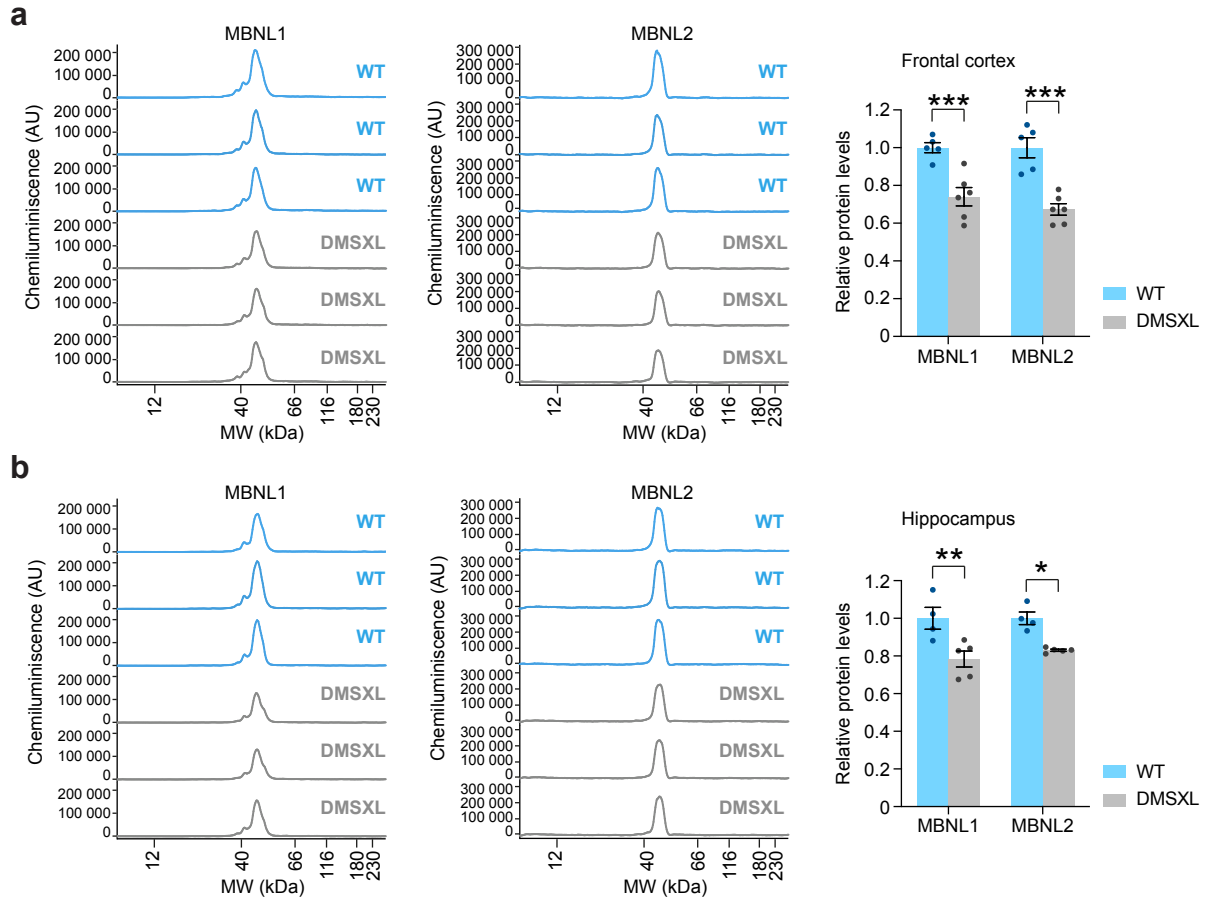

**Supplementary Fig. 8. DMSXL frontal cortex and hippocampus show MBNL1 and MBNL2 protein downregulation.** (a) Quantification of MBNL1 and MBNL2 protein levels in whole mouse frontal cortex tissue lysates at 1 month capillary basis electrophoresis, using antibodies against recombinant full length human proteins. Representative electrophoretic profiles are shown on the left. Data are means  $\pm$  SEM; n = 5, WT; n = 6, DMSXL (p = 0.0007, MBNL1, p < 0.0001, MBNL2; Two-way ANOVA, Sidak post-hoc pair-wise comparisons). (b) Quantification of MBNL1 and MBNL2 protein levels in whole mouse hippocampus tissue lysates at 1 month by capillary basis electrophoresis, using antibodies raised against recombinant full length human proteins. Representative electrophoretic profiles are shown on the left. Data are means  $\pm$  SEM, n = 4, WT; n = 5, DMSXL (p = 0.0026, MBNL1; p = 0.0143, MBNL2; Two-way ANOVA, Sidak post-hoc pair-wise comparisons). Source data are provided as a Source Data file. \* p < 0.05; \*\* p < 0.01; \*\*\* p < 0.001.

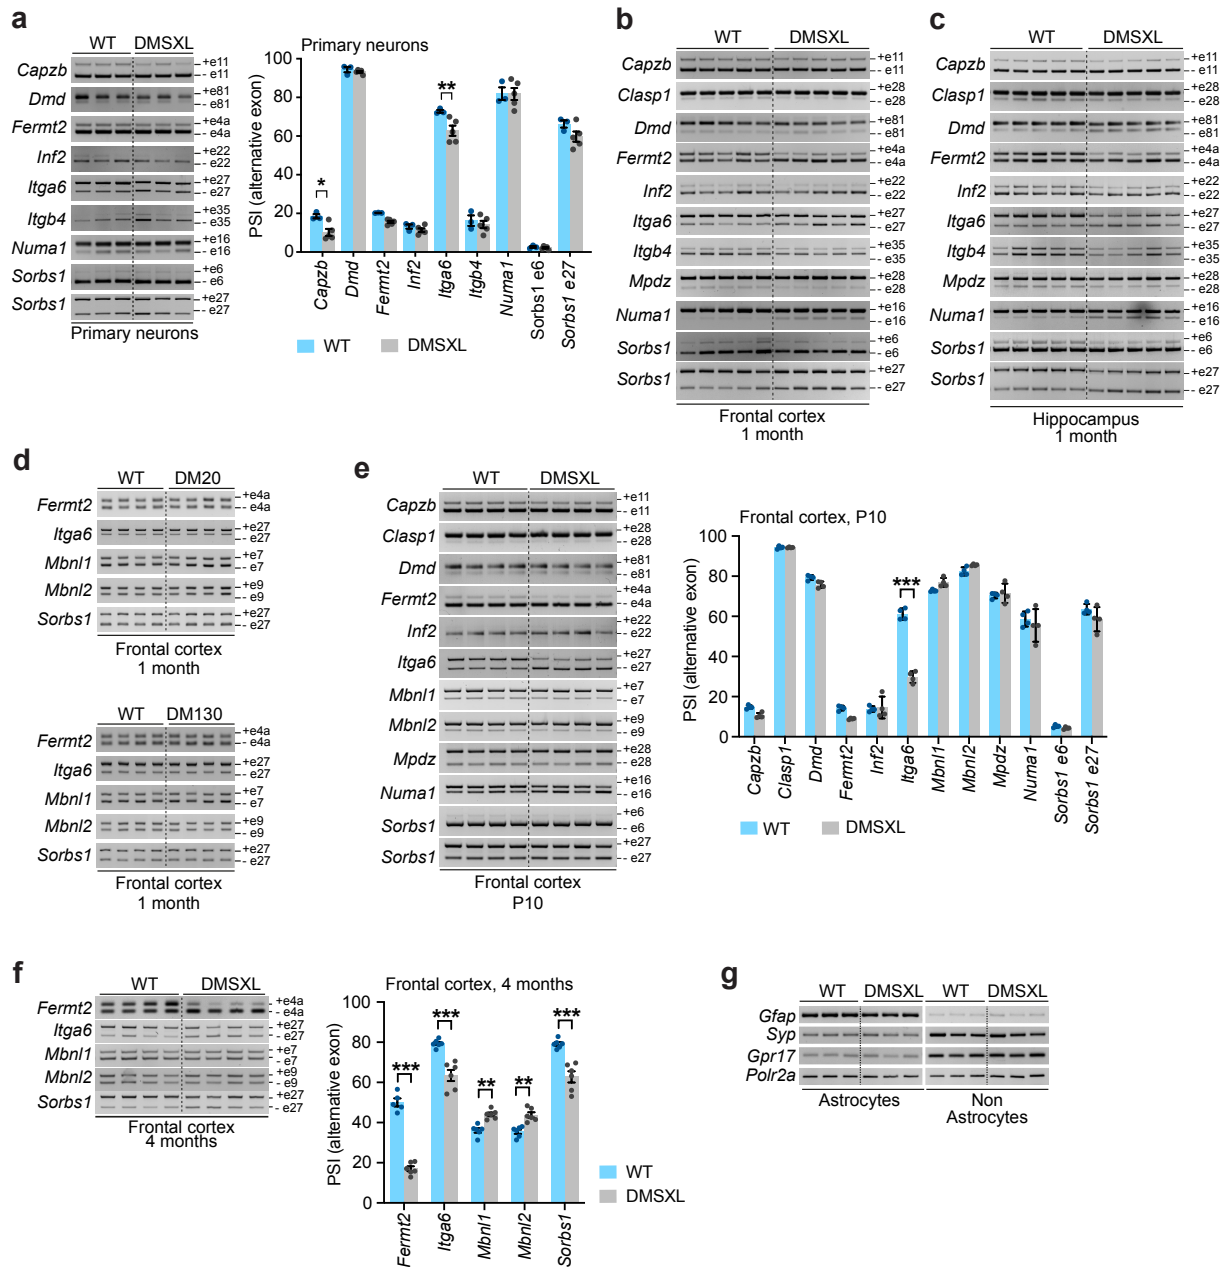

**Supplementary Fig. 9. DM1 RNA toxicity is more pronounced in mouse astrocytes than in neurons.** (a) Representative RT-PCR splicing analysis of transcripts associated with cell adhesion and cytoskeleton in primary DMSXL and WT neurons. Alternative exons are indicated on the right. The graph shows the PSI quantification of alternative exons. Data are means  $\pm$  SEM,  $n = 3$  independent WT cultures,  $n = 5$  independent DMSXL cultures ( $p = 0.0394$ , *Capzb*;  $p > 0.9999$ , *Dmd*, *Numa1*, *Sorbs1* e6;  $p = 0.6190$ , *Fermt2*;  $p = 0.9984$ , *Inf2*;  $p = 0.0066$ , *Itga6*;  $p = 0.9970$ , *Itgb4*;  $p = 0.1919$ , *Sorbs1* e27; Two-way ANOVA, Sidak post-hoc test for multiple comparisons). (b) Representative RT-PCR analysis of *Capzb*, *Clasp1*, *Dmd*, *Fermt2*, *Inf2*, *Itga6*, *Itgb4*, *Mpdz*, *Numa1*, *Sorbs1* in DMSXL frontal cortex, relative to WT control mice at 1 month of age. Alternative exons are indicated on the right. The experiment was performed on 4-5 animals of each genotype. (c) Representative RT-PCR splicing analysis of *Capzb*, *Clasp1*, *Dmd*, *Fermt2*, *Inf2*, *Itga6*, *Itgb4*, *Mpdz*, *Numa1*, *Sorbs1* in DMSXL hippocampus, relative to WT control mice at 1 month of age. Alternative exons are indicated on the right. The experiment was performed on 6 animals of each genotype.

**(d)** Representative RT-PCR splicing analysis of *Fermt2*, *Itga6*, *Mbnl1*, *Mbnl2* and *Sorbs1* in the frontal cortex of 1-month-old DM20 and DM130 mice, expressing shorter CUG RNA transcripts. Alternative exons are indicated on the right. The experiment was performed on 4 animals of each genotype. **(e)** Representative RT-PCR splicing analysis of selected transcripts in the frontal cortex of DMSXL and WT mice at postnatal 10. Alternative exons are indicated on the right. PSI quantification of alternative exons. Data are means  $\pm$  SEM, n = 4 mice per genotype (p = 0.4781, *Capzb*; p > 0.9999, *Clasp1*, *Inf2*, *Mpdz*, *Sorbs1* e6; p = 0.7121, *Dmd*; p = 0.1563, *Fermt2*; p < 0.0001, *Itga6*; p = 0.5083, *Mbnl1*; p = 0.8247, *Mbnl2*; p = 8181, *Numa1*; p = 0.2244, *Sorbs1* e27; Two-way ANOVA, Sidak post-hoc test for multiple comparisons). **(f)** Representative RT-PCR splicing analysis in the frontal cortex of DMSXL mice at 4 months of age. Alternative exons are indicated on the right. The graph shows the PSI quantification of alternative exons. Data are means  $\pm$  SEM, n = 5-6 mice per genotype (p < 0.0001, *Fermt2*, *Itga6*, *Sorbs1*; p = 0.0058, *Mbnl1*; p = 0.0036, *Mbnl2*; Two-way ANOVA, Sidak post-hoc test for multiple comparisons). **(g)** Semi-quantitative expression analysis of *Gfap*, *Syp* and *Gpr17* in astrocyte and non-astrocyte cell fractions, purified from the forebrain of 1-month-old mice. n = 3 independent cell fractions, collected from 3 animals per genotype. Source data are provided as a Source Data file. \* p<0.05; \*\* p<0.01; \*\*\* p<0.001.

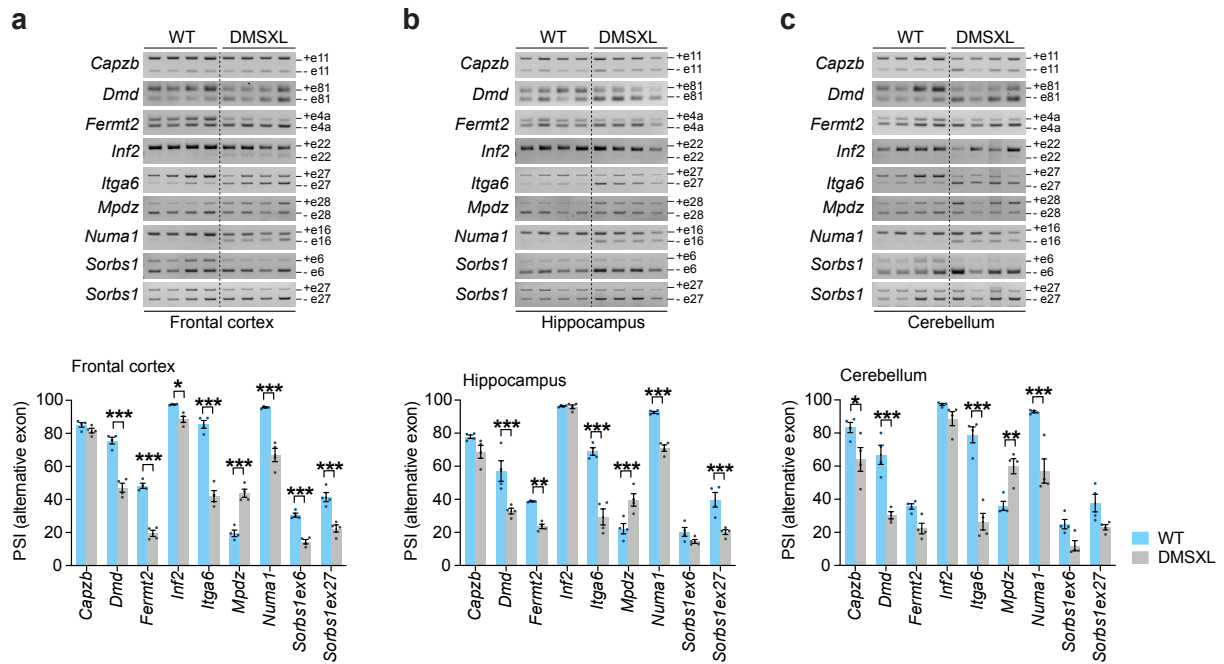

**Supplementary Fig. 10. Regional distribution of RNA missplicing in astrocytes isolated from different brain areas** (a) Representative RT-PCR splicing analysis in astrocytes acutely isolated from the frontal cortex of 1-month-old mice ( $p = 0.9363$ , *Capzb*;  $p < 0.0001$ , *Dmd*, *Fermt2*, *Itga6*, *Mpdz*, *Numa1*, *Sorbs1* e6, *Sorbs1* e27,  $p = 0.0385$ , *Inf2*; Two-way ANOVA, Sidak post-hoc test for multiple comparisons). (b) Representative RT-PCR splicing analysis in astrocytes acutely isolated from the hippocampus of 1-month-old mice ( $p = 0.2313$ , *Capzb*;  $p < 0.0001$ , *Dmd*, *Itga6*, *Numa1*, *Sorbs1* e27,  $p = 0.0040$ , *Fermt2*;  $p > 0.9999$ , *Inf2*;  $p = 0.0006$ , *Mpdz*;  $p = 0.7837$ , *Sorbs1* e6; Two-way ANOVA, Sidak post-hoc test for multiple comparisons). (c) Representative RT-PCR splicing analysis in astrocytes acutely isolated from the cerebellum of 1-month-old mice ( $p = 0.0159$ , *Capzb*;  $p < 0.0001$ , *Dmd*, *Itga6*, *Numa1*;  $p = 0.2146$ , *Fermt2*;  $p = 0.7672$ , *Inf2*;  $p = 0.0013$ , *Mpdz*;  $p = 0.2406$ , *Sorbs1* e6;  $p = 0.1338$ , *Sorbs1* e27; Two-way ANOVA, Sidak post-hoc test for multiple comparisons). Alternative exons are indicated on the right. The graphs represent the PSI quantification of alternative exons in astrocytes acutely isolated from individual brain areas. Data are means  $\pm$  SEM,  $n = 4$  independent cell fractions per genotype, isolated from 4 different animals. Source data are provided as a Source Data file. \*  $p < 0.05$ ; \*\*  $p < 0.01$ ; \*\*\*  $p < 0.001$ .

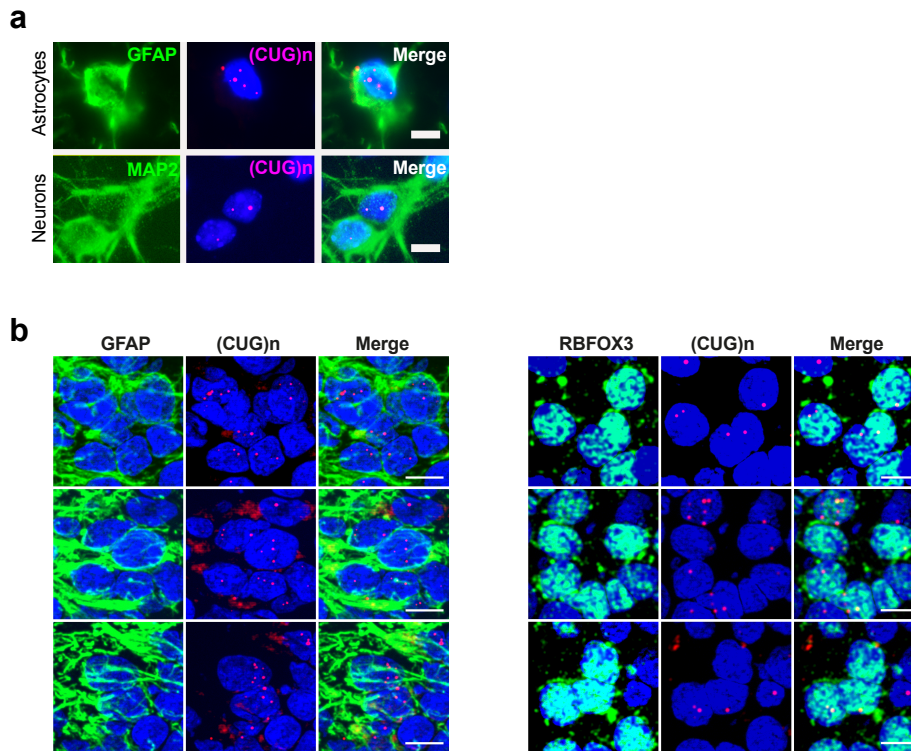

**Supplementary Fig. 11. Foci accumulation in DM1 human brains. (a)** FISH analysis of nuclear foci accumulation in human frontal cortex. Representative GFAP-expressing astrocytes and MAP2-positive neurons are shown. Scale bar, 10  $\mu$ m. **(b)** RNA FISH combined with protein immunofluorescence, illustrating greater foci accumulation in GFAP-expressing-astrocytes, relative to RBFOX3/NeuN-expressing neurons. Scale bar, 10  $\mu$ m. The experiments were performed on tissue samples from 3 DM1 individuals.

## Supplementary Tables

### Supplementary Table 1. RNA sequencing of primary DMSXL brain cells versus primary WT control cultures.

Data uploaded onto the GEO database.

GEO accession: GSE162093.

<https://www.ncbi.nlm.nih.gov/geo/query/acc.cgi?&acc=GSE162093>

### Supplementary Table 2. Summary of transcript expression changes in DMSXL astrocytes.

| Gene                           | Expression (RPM) |             | Log <sub>2</sub> fold change | P <sub>adjusted</sub> <sup>b</sup> | Protein function                                            |
|--------------------------------|------------------|-------------|------------------------------|------------------------------------|-------------------------------------------------------------|
|                                | WT               | DMSXL       |                              |                                    |                                                             |
| <i>Fbxl7</i> <sup>a</sup>      | 208.5±16.7       | 22.8±5.5    | -3.2                         | 3.6E-34                            | Component of a E3 ubiquitin protein complex <sup>1</sup>    |
| <i>Rnf130</i>                  | 2217.0±64.9      | 1586.0±17.9 | 1.7                          | 6.4E-06                            | E3 ubiquitin protein ligase <sup>2</sup>                    |
| <i>Coll5a1</i>                 | 35.2±1.5         | 110.7±15.4  | -0.48                        | 8.5E-09                            | Structural protein of the extracellular matrix <sup>3</sup> |
| <i>Vsir</i><br>(4632428N05Rik) | 950.0±28.9       | 712.6±17.2  | -0.41                        | 1.2E-03                            | Immunoregulatory receptor <sup>4</sup>                      |
| <i>Mov10</i>                   | 748.2±28.8       | 550.2±13.6  | -0.44                        | 5.1E-03                            | RNA helicase. miRNA processing <sup>5</sup>                 |

<sup>a</sup>Transgene integration site. *Fbxl7* gene expression is disrupted by the human transgene. <sup>b</sup>Wald test adjusted for multiple comparisons, using the procedure of Benjamini and Hochberg.

### Supplementary Table 3. Genes selected for missplicing validation in primary DMSXL astrocytes. Genes are distributed by the three top categories enriched in primary DMSXL astrocytes. GO ontology terms associated with each category are categorized into one of the 3 ontologies. BP, biological process; CC, cellular component; MF, molecular function.

| Category        | Accession ID | Name                                                                 | Ontology | Genes for validation                        |
|-----------------|--------------|----------------------------------------------------------------------|----------|---------------------------------------------|
| Cell adhesion   | GO:0048041   | Focal adhesion assembly                                              | BP       | <i>Clasp1</i>                               |
|                 | GO:0010810   | Regulation of cell-substrate adhesion                                | BP       | <i>Dmd</i><br><i>Fermt2</i>                 |
|                 | GO:0005913   | Cell-cell adherens junction                                          | CC       | <i>Itga6</i>                                |
|                 | GO:0005925   | Focal adhesion                                                       | CC       | <i>Itgb4</i>                                |
|                 | GO:0050839   | Cell adhesion molecule binding                                       | MF       | <i>Mpdz</i><br><i>Sorbs1</i>                |
| Cytoskeleton    | GO:0031110   | Regulation of microtubule polymerization or depolymerization         | BP       | <i>Clasp1</i><br><i>Fermt2</i>              |
|                 | GO:0005874   | Microtubule                                                          | CC       | <i>Inf2</i>                                 |
|                 | GO:0008017   | Microtubule binding                                                  | MF       | <i>Numa1</i>                                |
|                 | GO:0015631   | Tubulin binding                                                      | MF       |                                             |
|                 | GO:0008092   | Cytoskeletal protein binding                                         | MF       |                                             |
| Plasma membrane | GO:0099072   | Regulation of postsynaptic membrane neurotransmitter receptor levels | BP       | <i>Capzb</i><br><i>Clasp1</i><br><i>Dmd</i> |
|                 | GO:0099738   | Cell cortex region                                                   | CC       | <i>Fermt2</i>                               |
|                 | GO:0030027   | Lamellipodium                                                        | CC       | <i>Mpdz</i>                                 |
|                 | GO:0030165   | PDZ domain binding                                                   | MF       | <i>Numa1</i>                                |

**Supplementary Table 4. Primary antibodies for western blotting and immunofluorescence**

| Protein        | Supplier                  | Catalogue #            | RRID        | Application |
|----------------|---------------------------|------------------------|-------------|-------------|
| ALDH1L1        | Arigo                     | ARG10691               | N/A         | WB          |
| CELF1          | Millipore                 | 05-621                 | AB_309851   | WB          |
| CELF2          | Sigma                     | C9367                  | AB_1078584  | WB          |
| GAD65/GAD67    | Millipore                 | ABN904                 | AB_2893025  | IF          |
| GPHN           | Synaptic systems          | 147011                 | AB_887717   | IF          |
| GFAP           | Abcam                     | Ab7260-50              | AB_305808   | WB, IF      |
| GJA1           | Abcam                     | Ab11370                | AB_297976   | WB, IF      |
| GM130          | BD Biosciences            | 610822                 | AB_398141   | IF          |
| HOMER1         | Synaptic systems          | 160003                 | AB_887730   | IF          |
| MAP2           | Santa Cruz Biotechnology  | sc-80013               | AB_1126218  | IF          |
| MBNL1          | GE Morris; Oswestry, UK   | MB1a(4A8) <sup>a</sup> | AB_2618248  | WB, IF      |
|                | Abcam                     | Ab45899 <sup>b</sup>   | AB_1310475  | WB          |
| MBNL2          | GE Morris; Oswestry, UK   | MB2a(3B4) <sup>c</sup> | AB_2618250  | WB, IF      |
|                | Abcam                     | Ab105331 <sup>d</sup>  | AB_10862122 | WB          |
| RBFOX3/NeuN    | Abcam                     | Ab104225               | AB_10711153 | IF          |
| S100B          | Sigma                     | S2644                  | AB_477501   | IF          |
| SOX9           | R&D Systems               | AF3075                 | AB_2194160  | IF          |
| TUBB3          | Covance                   | PRB-435P-100           | AB_291637   | WB          |
| VCL (Vinculin) | Cell Signaling Technology | 4650                   | AB_10559207 | WB          |
|                | Sigma-Aldrich             | V9131                  | AB_477629   | IF          |
| VGLUT1         | Synaptic systems          | 135511                 | AB_887879   | IF          |

RRID, Research Resource Identifier; N/A, not applicable; WB, western blot; IF, immunofluorescence. <sup>a</sup>Rabbit antibody raised against recombinant full-length human MBNL1 protein (epitope: VPSL, amino acids 140-143). <sup>b</sup>Rabbit antibody raised against a synthetic peptide corresponding to human MBNL1 amino acid sequence 250-350. <sup>c</sup>Rabbit antibody raised against recombinant full-length human MBNL2 protein (epitope: PYLA, amino acids 132-135). <sup>d</sup>Rabbit antibody raised against a synthetic peptide corresponding to human MBNL2 amino acid sequence 46-95.

**Supplementary Table 5. Oligonucleotide primer sequences for qRT-PCR analysis.**

| Gene          | Oligonucleotide primer sequences                               |
|---------------|----------------------------------------------------------------|
| <i>Gfap</i>   | 5'-GCTAACGACTATCGCCGCCAAC-3'<br>5'-TCCAGCCGAGCAAGTGCCTC-3'     |
| <i>Gpr17</i>  | 5'-TCACAGCTTACCTGCTTCCC-3'<br>5'-GACCGTTCATCTTGTGGCTCT-3'      |
| <i>Mbnl1</i>  | 5'-CGGGAC ACA AAA TGG CTAAC-3'<br>5'-TTGCAGTTCTCTCTGGAGCA-3'   |
| <i>Mbnl2</i>  | 5'-CCCAAAGTTGCCAGGTTGA-3'<br>5'-AGTGTGTCGGAGGATGAAGA-3'        |
| <i>Polr2a</i> | 5'-GGCTGTGCGGAAGGCTCTG-3'<br>5'-TGCCTGGCGGTTGACCC-3'           |
| <i>Syp</i>    | 5'-CCCCCTTCCTTCTCTCCCTCTG-3'<br>5'-CCATCTCCTCTCCACCCATTCATC-3' |

**Supplementary Table 6. Oligonucleotide primer sequences for the splicing analysis of mouse alternative exons.**

| Gene          | Alternative exon <sup>a</sup> | Size (bp) | Oligonucleotide primer sequences                                         |
|---------------|-------------------------------|-----------|--------------------------------------------------------------------------|
| <i>Capzb</i>  | 11                            | 113       | 5'-GCACGCTGAATGAGATCTACTTTG-3'<br>5'-CCGGTTAGCGTGAAGCAGAG-3'             |
| <i>Clasp1</i> | 28                            | 24        | 5'-TGACCTGGAAGCAGCAGTGG-3'<br>5'-CCGCAGATAATGGGGAATGC-3'                 |
| <i>Dmd</i>    | 81                            | 32        | 5'-TCCCCAGGACACAAGCACAG-3'<br>5'-CCATCGCTCTGCCCAAATC-3'                  |
| <i>Fermt2</i> | 4a                            | 36        | 5'-GCTTGAGCTGGAAGGACCTCTTATC-3'<br>5'-GCAGAAGTTGGTGACAAAGGGC-3'          |
| <i>Fn1</i>    | 33                            | 270       | 5'-CCACTGTGGAGTACGTGGTTAGTG-3'<br>5'-TGGGTGTCACCTGACTGAACTTC-3'          |
| <i>Inf2</i>   | 22                            | 57        | 5'-CTGAAGATACCCCGGATGCC-3'<br>5'-CCGACGAGAGCACTCACTTG-3'                 |
| <i>Itga6</i>  | 27                            | 130       | 5'-GGGATTCTGATGCTGGCTCTATTAG-3'<br>5'-GGCTTTGGGTAGTGTGAGGTGTTTC-3'       |
| <i>Itgb4</i>  | 35                            | 162       | 5'-CAGGGTGGAGAAGACTACGAAAAC-3'<br>5'-GGTTAGGGATGTTGAGCCGATG-3'           |
| <i>Mbnl1</i>  | 7                             | 54        | 5'-GCTGCCCAATACCAGGTCAAC-3'<br>5'-TGGTGGGAGAAATGCTGTATGC-3'              |
| <i>Mbnl2</i>  | 9                             | 54        | 5'-ACCGTAACCGTTTGTATGGATTAC-3'<br>5'-CTTTGGTAAGGGATGAAGAGCAC-3'          |
| <i>Mbnl2</i>  | 11                            | 36        | 5'-GTCTTCAACCCAGCGTCTT-3'<br>5'-AGCCTTAGGGTTGTGGTCTG-3'                  |
| <i>Mpdz</i>   | 28                            | 99        | 5'-TGAACAAGCTGTGGAAGCCA-3'<br>5'-GGAGGGAGGAACATTGCACA-3'                 |
| <i>Numa1</i>  | 16                            | 42        | 5'-GACCCACTTGGCTGAAATGC-3'<br>5'-GTCAGCTTCTTACTTAGTTCTTCC-3'             |
| <i>Sorbs1</i> | 6                             | 90        | 5'-CTGCATCTGGGAAGACTCGCCT-3'<br>5'-GACTTGCTTTCATGCTTCGGAGATTC-3'         |
| <i>Sorbs1</i> | 27                            | 168       | 5'-CCAGCTGATTACTTGGAGTCCACAGAAG-3'<br>5'-GTTACCTTCATACCAGTTCTGGTCAATC-3' |

<sup>a</sup> Alternative exons are numbered according to the FasterDB web interface (<http://fasterdb.ens-lyon.fr/faster/home.pl>)



**Supplementary Table 7. Oligonucleotide primer sequences for the splicing analysis of human alternative exons.**

| <b>Gene</b>   | <b>Alternative exon<sup>a</sup></b> | <b>Size (bp)</b> | <b>Oligonucleotide primer sequences</b>                         |
|---------------|-------------------------------------|------------------|-----------------------------------------------------------------|
| <i>CAPZB</i>  | 10b                                 | 113              | 5'-GCACCGCCCATTACAAGTTG-3'<br>5'-AGCCTCCACCAGGTCATTCTTC-3'      |
| <i>CLASP1</i> | 27                                  | 108              | 5'-CGCTAAAGTGGTTTCACAGTCCC-3'<br>5'-TTCTGCTACATCCTCAGTCTGCCG-3' |
| <i>DMD</i>    | 85                                  | 32               | 5'-TCCCCAGGACACAAGCACAG-3'<br>5'-CATCGCTCTGCCCAAATCATC-3'       |
| <i>FERMT2</i> | 4a                                  | 33               | 5'-TGACCAGTCTGAAGATGAGGCAC-3'<br>5'-GCTTGAGGCTTGAACATTTTGC-3'   |
| <i>INF2</i>   | 22                                  | 57               | 5'-GGAAGCGAAGGAAGAAGCGTC-3'<br>5'-GGTTGCCTTTAGGAAGCAGGTG-3'     |
| <i>ITGA6</i>  | 27                                  | 130              | 5'-GAGTGACTGTGTTTCCCTCAAAGAC-3'<br>5'-CAGCCACGCCAAAAATAAAGG-3'  |
| <i>ITGB4</i>  | 35                                  | 159              | 5'-CCGCTCAGAACAACACTCACACTCG-3'<br>5'-TGGTTGGGCAGGAGGTCTTC-3'   |
| <i>MPDZ</i>   | 28                                  | 99               | 5'-CCATTTCGAAAAGCAGGCAAC-3'<br>5'-TTCGGCAAAGGCTGAAGGAG-3'       |
| <i>NUMA1</i>  | 20                                  | 42               | 5'-GTATGAGGGTGCCAAGGTCAAG-3'<br>5'-TGGTCAGAGTCAGCCAGTTTCTTAC-3' |
| <i>POLR2A</i> | N/A                                 | N/A              | 5'-AGAGAAGCTGGTGCTCCGTA-3'<br>5'-AGCGCAGGAAGACATCATCA-3'        |
| <i>SORBS1</i> | 6                                   | 96               | 5'-AGTTGCAGACGACTTGTCTGC-3'<br>5'-CCCTTCCCAGTGCAGATTTTTC-3'     |
|               | 30                                  | 168              | 5'-CTGGGGATCTCACTAGCTTGGAG-3'<br>5'-GCCGTGGTGTTCTCCTTCATAC-3'   |

<sup>a</sup> Alternative exons are numbered according to the FasterDB web interface (<http://fasterdb.ens-lyon.fr/faster/home.pl>)

## Supplementary References

1. Liu, Y. *et al.* The Proapoptotic F-box Protein Fbx17 Regulates Mitochondrial Function by Mediating the Ubiquitylation and Proteasomal Degradation of Survivin. *Journal of Biological Chemistry* **290**, 11843–11852 (2015).
2. Guais, A. *et al.* h-Goliath, paralog of GRAIL, is a new E3 ligase protein, expressed in human leukocytes. *Gene* **374**, 112–120 (2006).
3. Myllyharju, J. & Kivirikko, K. I. Collagens, modifying enzymes and their mutations in humans, flies and worms. *Trends in Genetics* **20**, 33–43 (2004).
4. Lines, J. L. *et al.* VISTA Is an Immune Checkpoint Molecule for Human T Cells VISTA Negatively Regulates Human T Cells. *Cancer Research* **74**, 1924–1932 (2014).
5. Gregersen, L. H. *et al.* MOV10 Is a 5' to 3' RNA Helicase Contributing to UPF1 mRNA Target Degradation by Translocation along 3' UTRs. *Molecular Cell* **54**, 573–585 (2014).

**Original uncropped scans of blots and gels**

# Figure 1

## Panel 1b

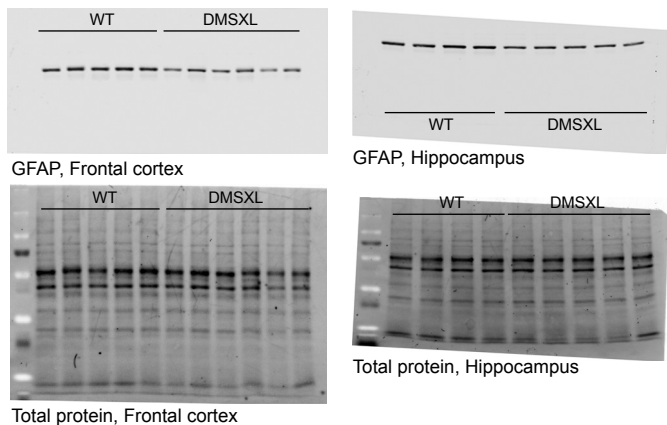

# Figure 4

## Panel 4c

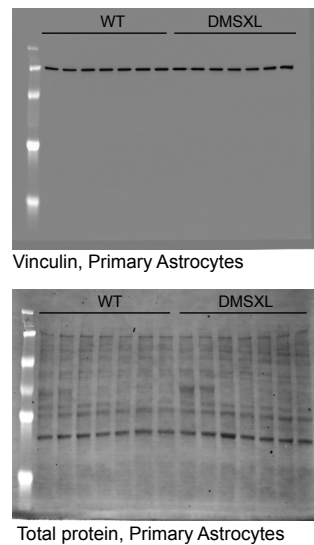

# Figure 6

## Panel 6d

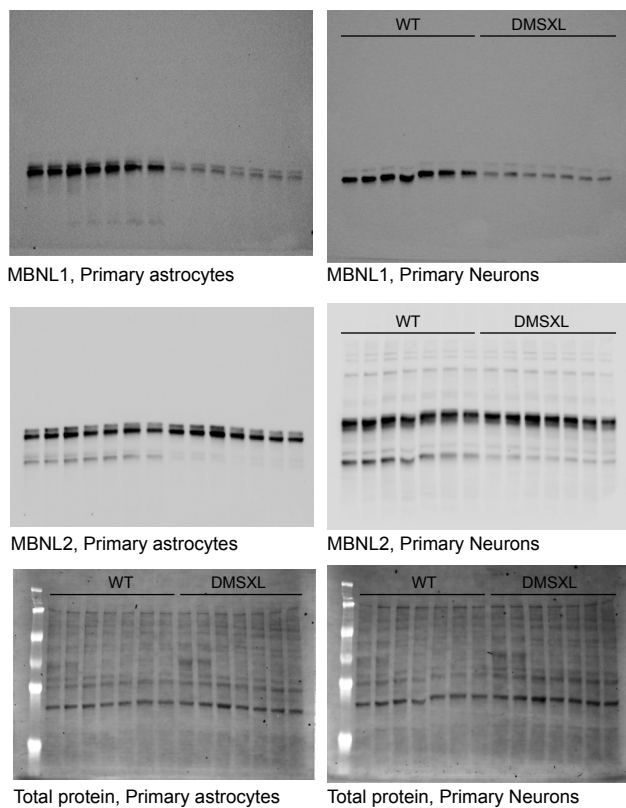

## Panel 6e

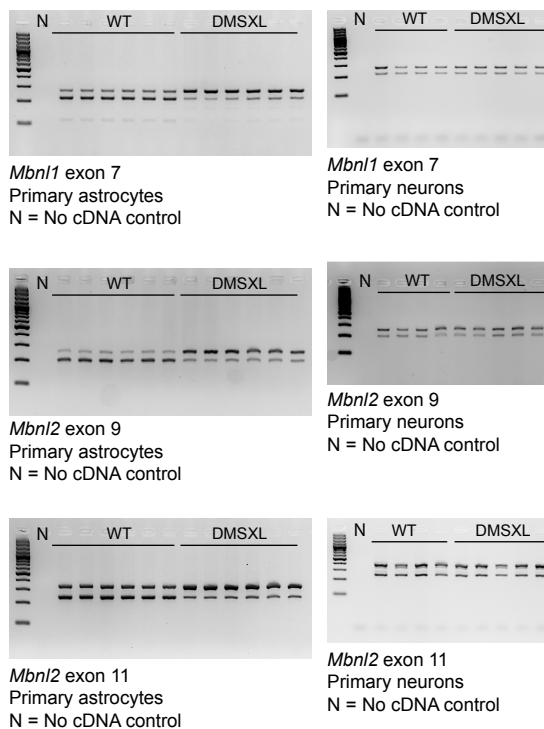

# Figure 7

## Panel 7b

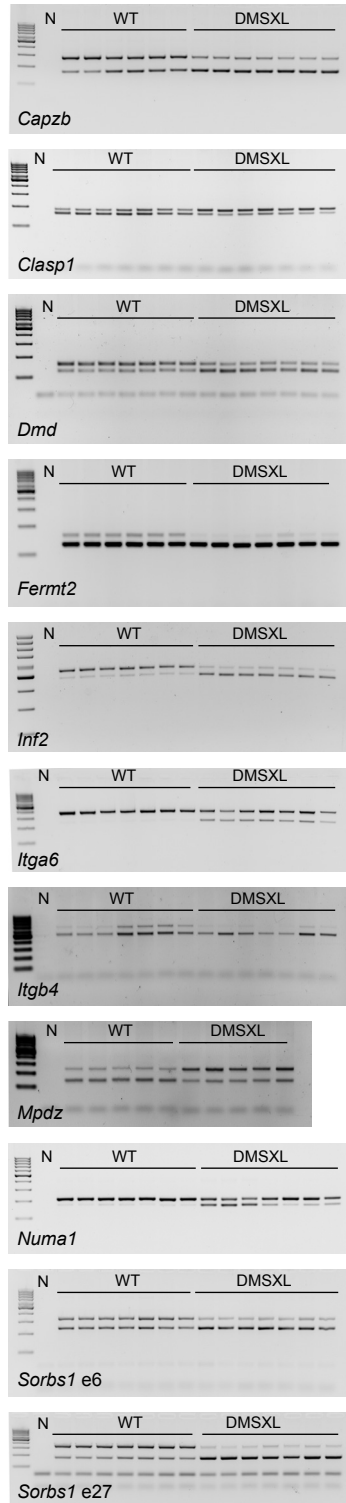

N = No cDNA control  
T = Tissue cDNA control

## Panel 7e

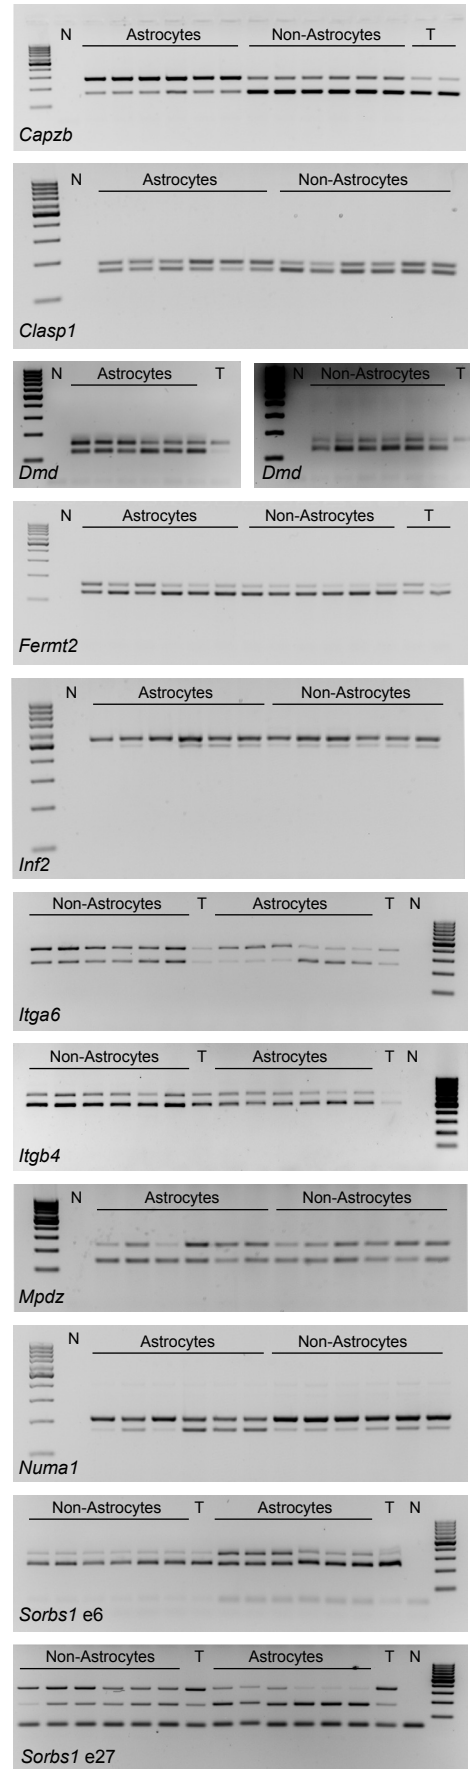

N = No cDNA control  
T = Tissue cDNA control

# Figure 8

## Panel 8a

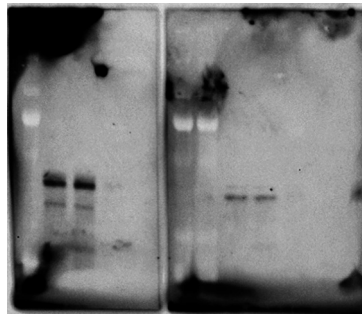

MBNL1 MBNL2

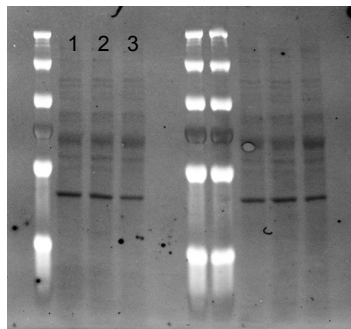

Total protein

## Panel 8d

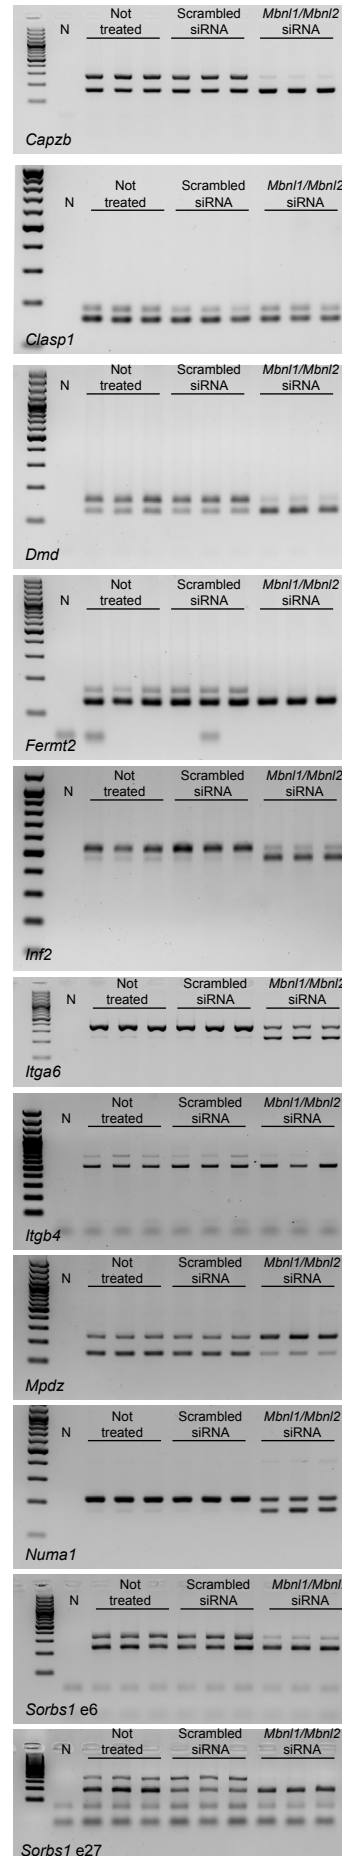

N = No cDNA control

# Figure 9

**Panel 9c**

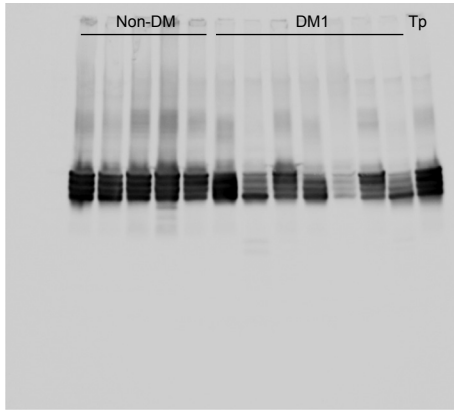

GFAP  
Human frontal cortex  
Tp = Temporal cortex, excluded from analysis

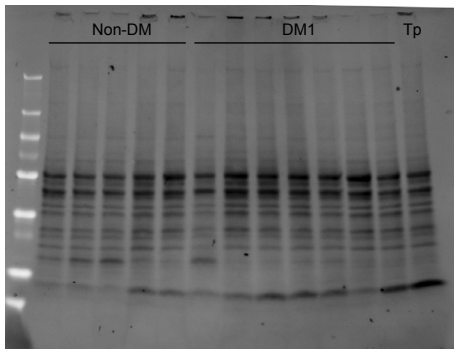

Total protein  
Human frontal cortex  
Tp = temporal cortex, excluded from analysis

**Panel 9d**

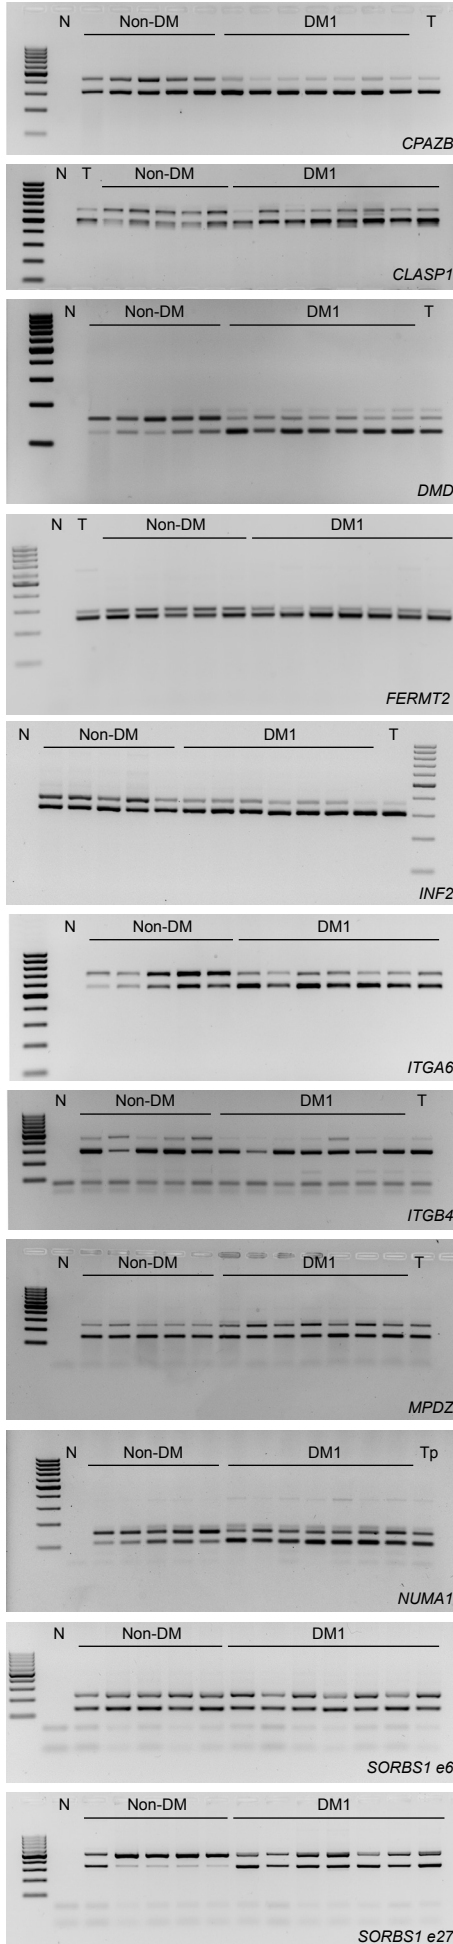

N = No cDNA control  
T = Brain tissue cDNA control

**Panel 9e**

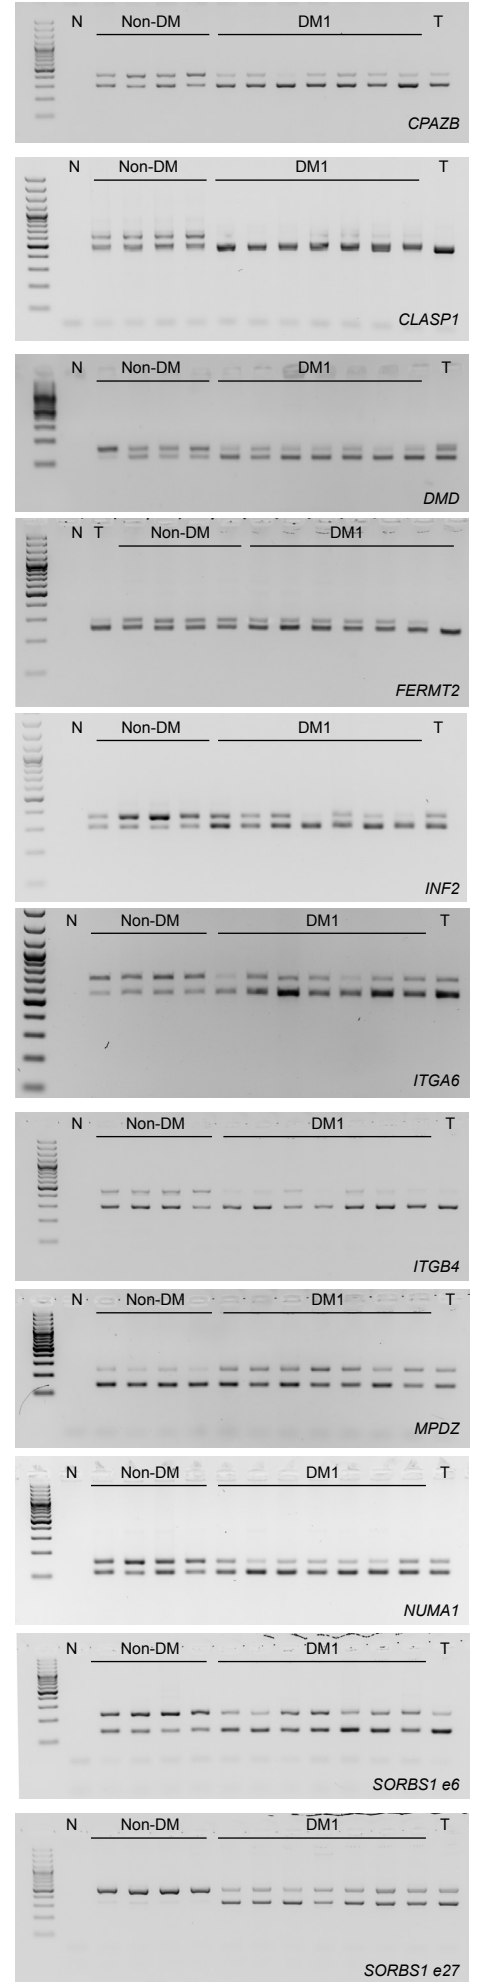



# Supplementary Figure 9

Panel S9a

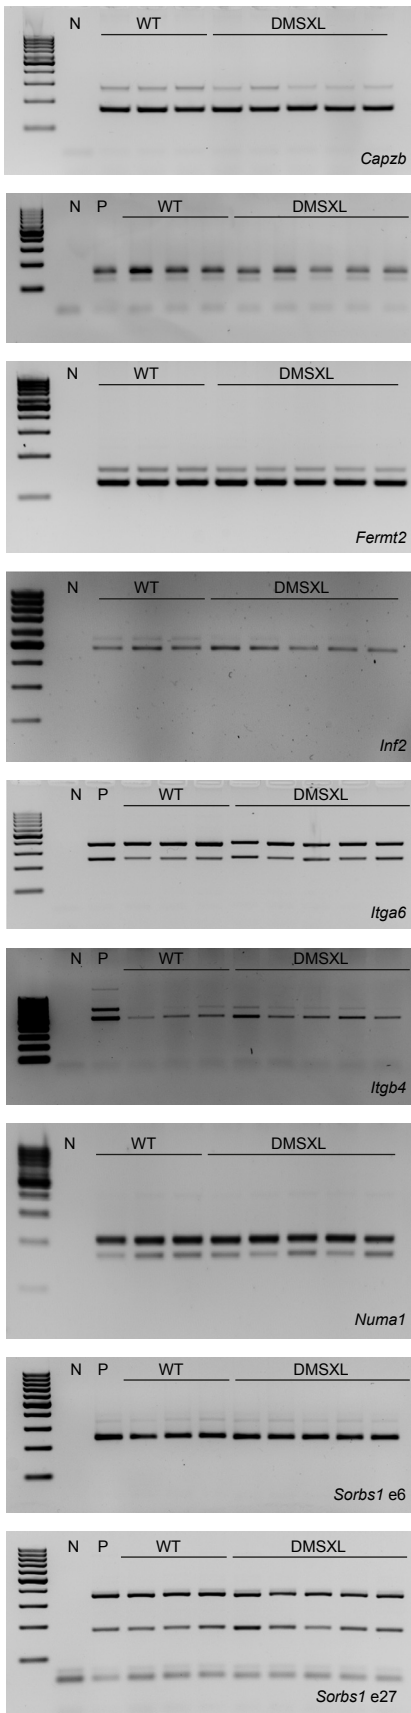

N = No cDNA control  
P = cDNA pool, positive control

Panel S9b

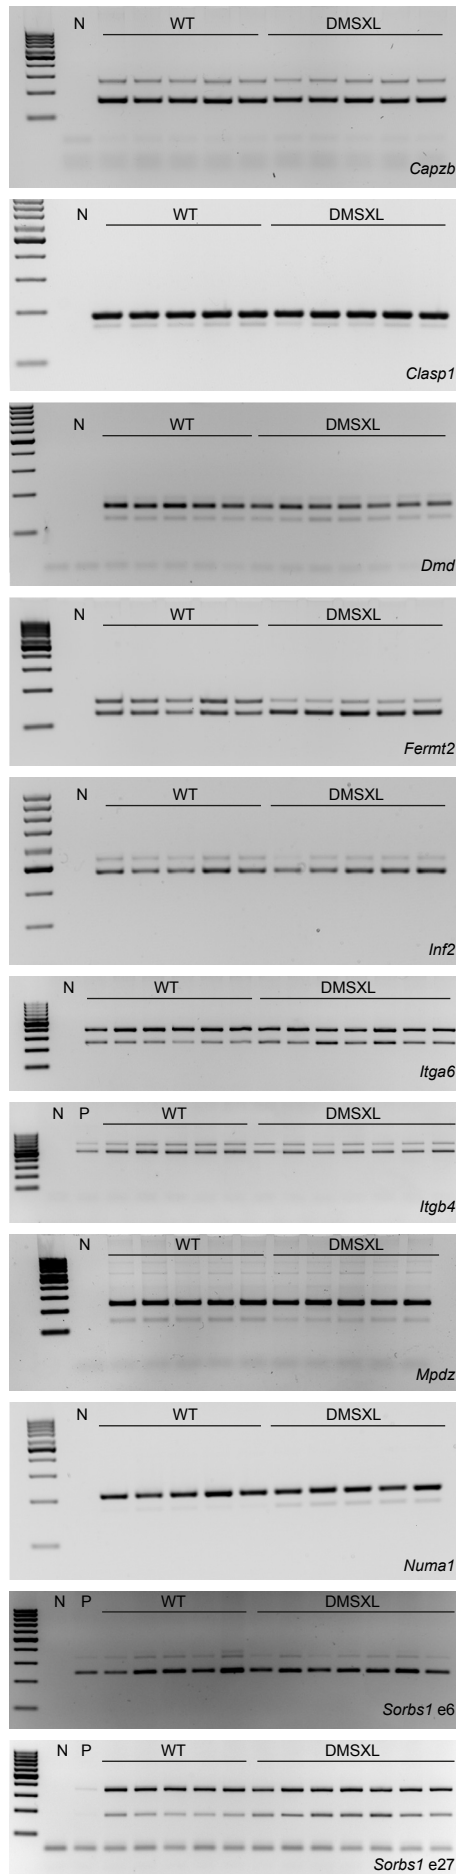

N = No cDNA control  
P = cDNA pool, positive control

Panel S9c

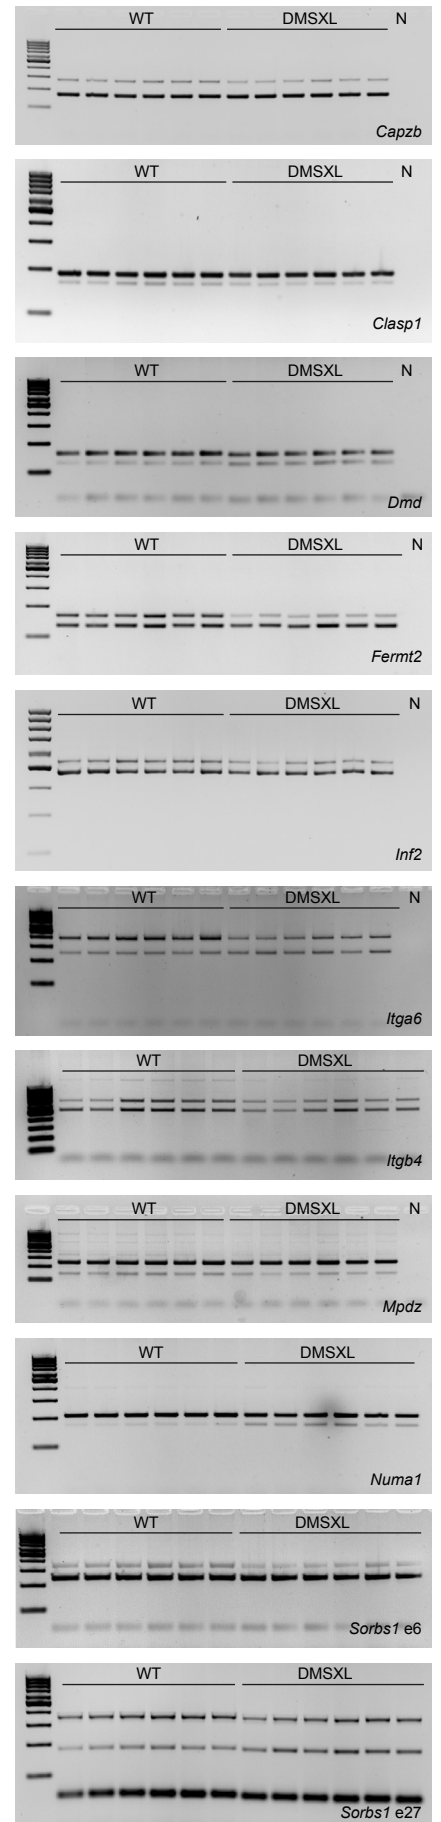

N = No cDNA control  
P = cDNA pool, positive control

Lorem ipsum



# Supplementary Figure 9

Panel S9d

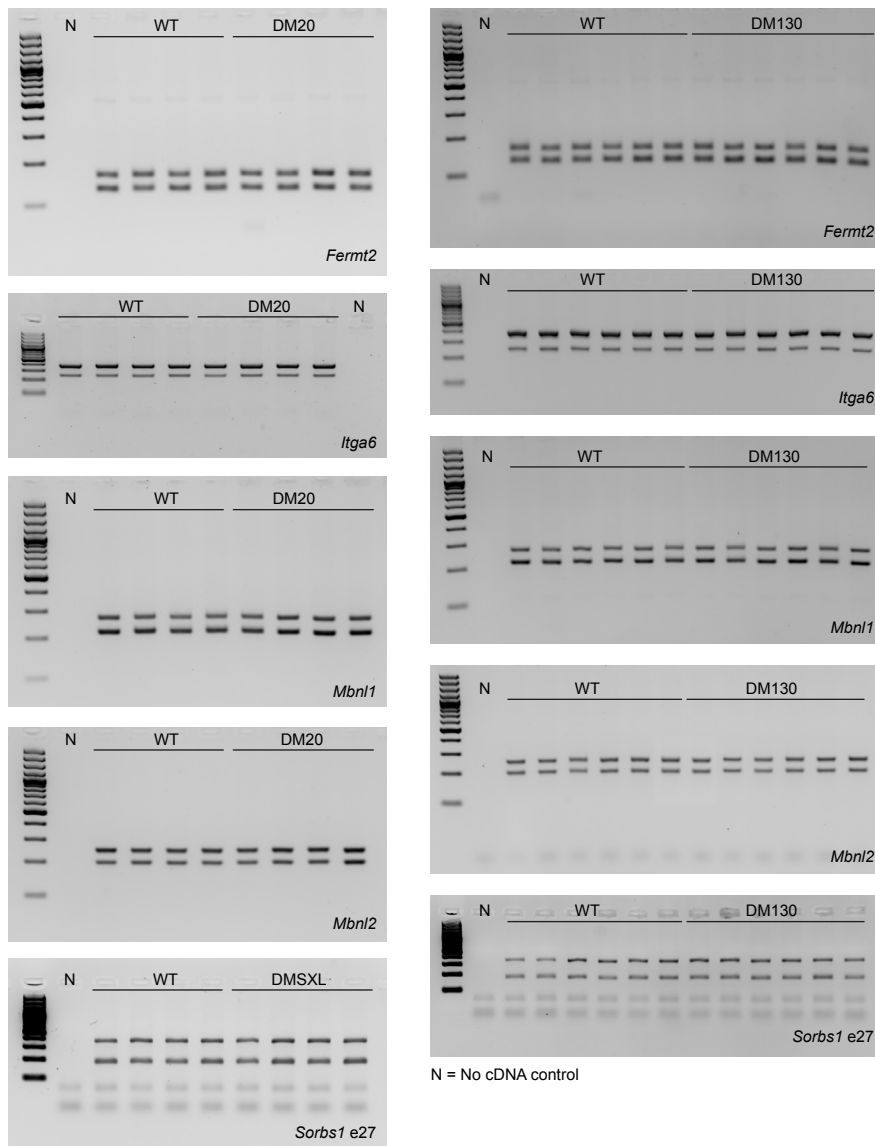

Panel S9e

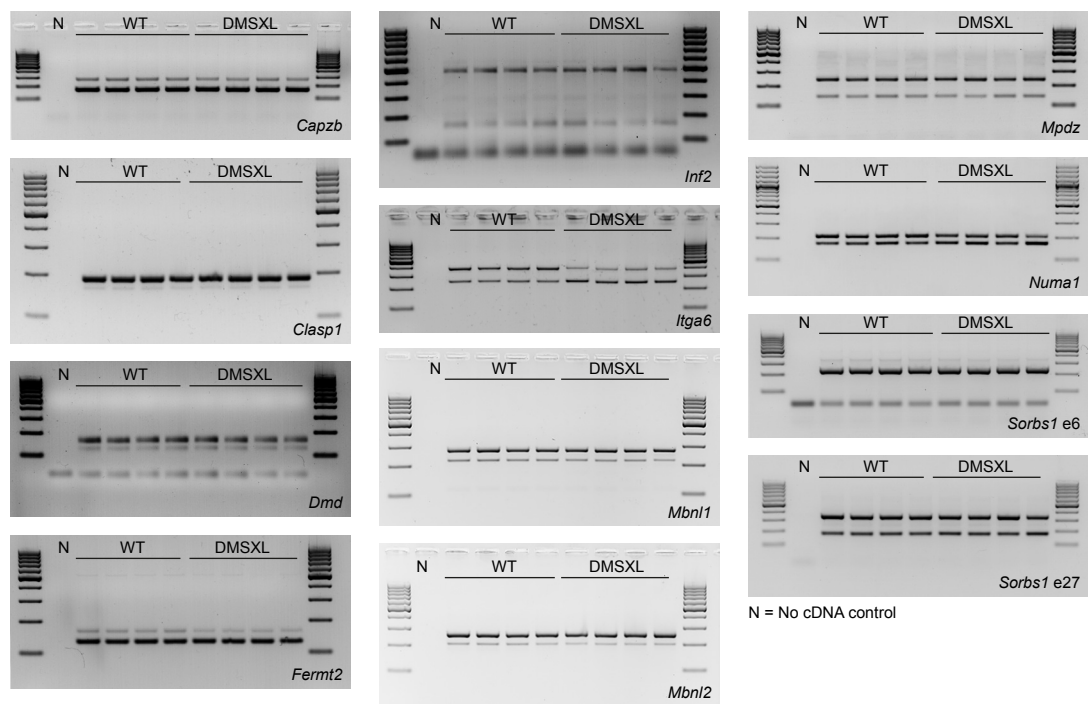

# Supplementary Figure 9

## Panel S9f

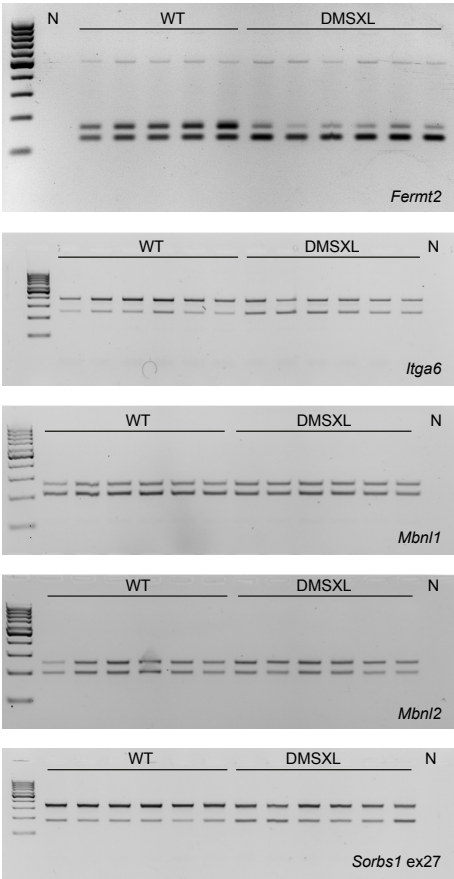

N = No cDNA control

## Panel S9g

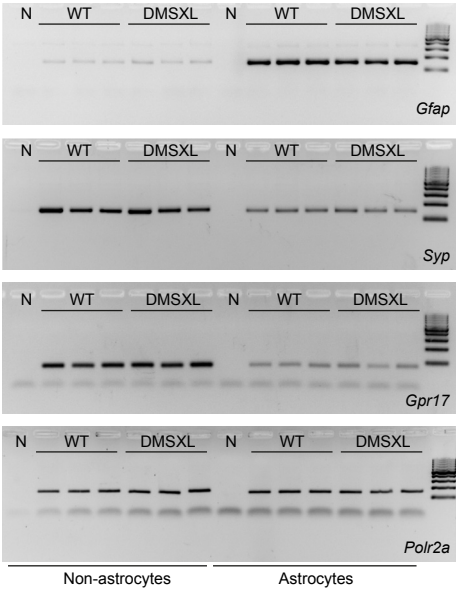

N = No cDNA control

# Supplementary Figure 10

Panel S10a

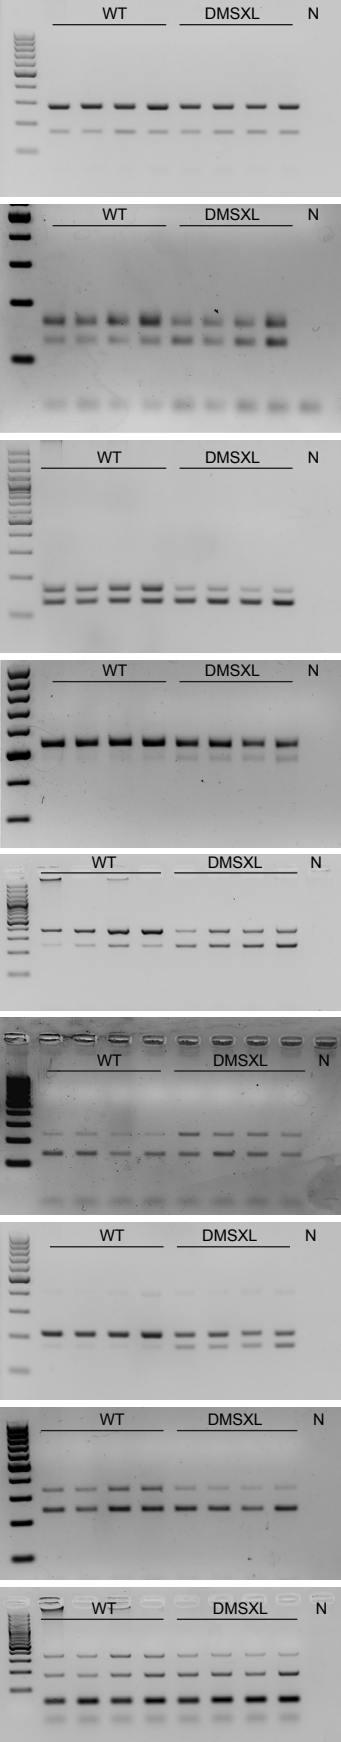

N = No cDNA control

Panel S10b

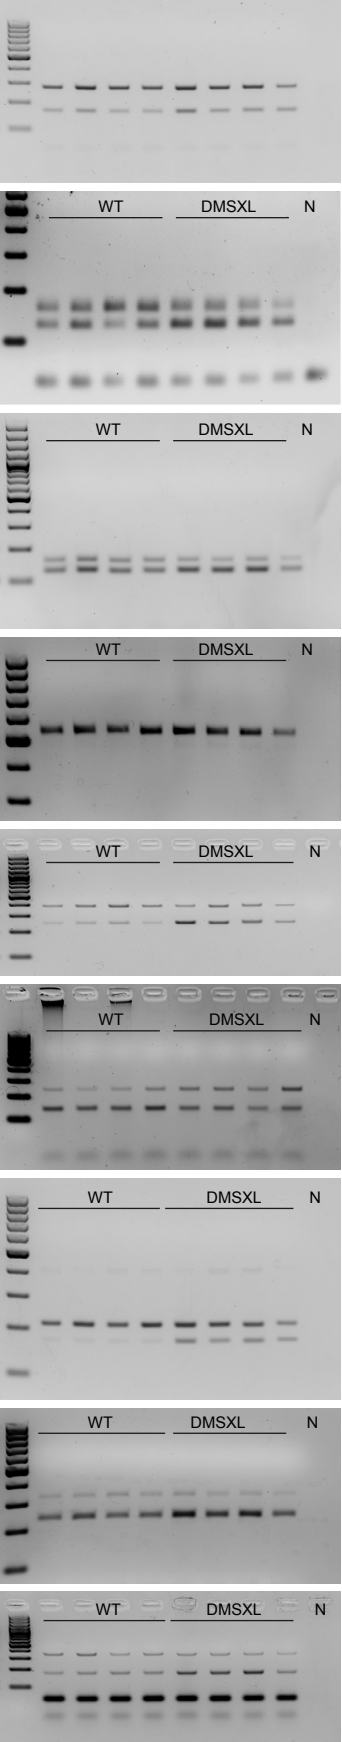

N = No cDNA control

Panel S10c

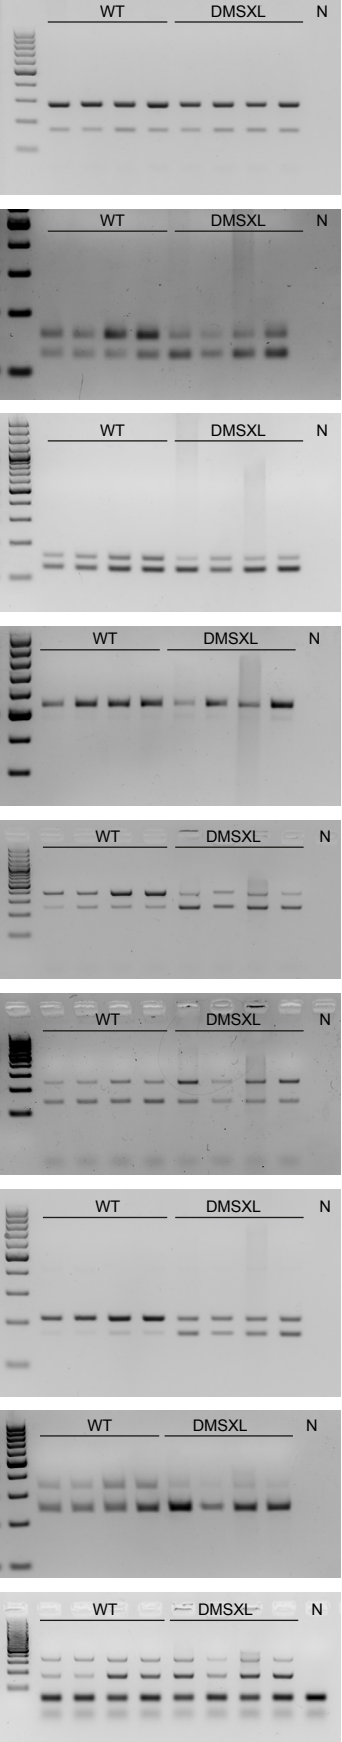

N = No cDNA control
